# Supplementary material
Source: MDPI journal article supplement (https://www.mdpi.com/2073-4344/11/8/876)
Supplement: s1 [file s1]

*Supplementary materials*

# Synthesis of Alpha Olefins: Catalytic Decarbonylation of Carboxylic Acids and Vegetable Oil Deodorizer Distillate (VODD)

Hang Wai Lee <sup>1</sup> and Ka-Fu Yung <sup>1\*</sup>

<sup>1</sup> Department of Applied Biology and Chemical Technology, The Hong Kong Polytechnic University, Hung Hom, Kowloon, Hong Kong 100077, China; alston.lee@polyu.edu.hk

\* Correspondence: bckfyung@polyu.edu.hk

## Table of Contents

|                                                                                                                             |        |
|-----------------------------------------------------------------------------------------------------------------------------|--------|
| 1. General considerations                                                                                                   | S2     |
| 2. Determination of free fatty acid % (FFA%) in canola oil deodorizer distillate by titrimetric method                      | S3     |
| 3. Determination of the composition of fatty acids in canola oil deodorizer distillate by GC method                         | S3     |
| 4. Preparation of quinoline-scaffold monophosphine (NP-1, NP-2) and naphthalene-scaffold monophosphine (CP-1, CP-2) ligands | S4-7   |
| 5. Determination of fatty acid profile by GC-FID                                                                            | S8-12  |
| 6. Characterization data for alkene products                                                                                | S13-15 |
| 7. <sup>1</sup> H, <sup>13</sup> C, <sup>31</sup> P NMR, MS and HRMS spectra                                                | S16-45 |
| 8. X-ray crystalline structure for complexes                                                                                | S46-69 |
| 9. References                                                                                                               | S70    |

## 1. General Considerations

Unless otherwise noted, all reagents were purchased from commercial suppliers and used without purification [1]. Toluene and THF were freshly distilled from sodium and sodium benzophenone ketyl under nitrogen. All decarbonylation reactions were performed in resealable screw cap Schlenk tube (approx. 15 mL volume) in the presence of Teflon-coated magnetic stirrer bar (4 mm × 10 mm). 2-(2-Bromophenyl)naphthalene and Ligands **L3** – **L9** were purchased from commercial suppliers. New bottle of *n*-butyllithium was used (*Note*: since the concentration of *n*-BuLi may vary, we recommend performing a titration prior to use). Thin layer chromatography was performed on pre-coated silica gel 60 F<sub>254</sub> plates. Silica gel (Merck, 70-230 and 230-400 mesh) was used for column chromatography. Melting points were recorded on an uncorrected Büchi Melting Point B-545 instrument. NMR spectra were recorded on a Bruker spectrometer (400 MHz for <sup>1</sup>H, 100 MHz for <sup>13</sup>C and 162 MHz for <sup>31</sup>P). Spectra were referenced internally to the residual proton resonance in CDCl<sub>3</sub> (δ 7.26 ppm) as the internal standard. Chemical shifts (δ) were reported as part per million (ppm) in δ scale downfield from TMS. <sup>13</sup>C NMR spectra were referenced to CDCl<sub>3</sub> (δ 77.0 ppm, the middle peak). <sup>31</sup>P NMR spectra were referenced to 85% H<sub>3</sub>PO<sub>4</sub> externally. Coupling constants (*J*) were reported in Hertz (Hz). Mass spectra (EI-MS and ES-MS) were recorded on a HP 5989B Mass Spectrometer. High-resolution mass spectra (HRMS) were obtained on a Bruker APEX 47e FTICR mass spectrometer (ESI-MS). GC-MS analysis was conducted on a HP 5973 GCD system using a HP5MS column (30 m × 0.25 mm). The products described in GC yield were accorded to the authentic samples/dodecane calibration standard from Agilent 6890A GC-FID system. X-ray crystal structure was determined by Bruker D8 Venture. All yields reported refer to isolated yield of compounds estimated to be greater than 95% purity as determined by capillary gas chromatography (GC) or <sup>1</sup>H NMR. Compounds described in the literature were characterized by comparison of their <sup>1</sup>H and/or <sup>13</sup>C NMR spectra to the previously reported data. The procedures in this section are representative, and thus the yields may differ from those reported in tables.

## 2. Determination of free fatty acid % (FFA%) in canola oil deodorizer distillate by titrimetric method

0.5–2.0 g of samples (based on the expected acidity) were weighed into Erlenmeyer flasks. Neutralized 2-propanol (50 mL) was added. The flask was placed on a hot plate and the temperature was regulated to about 40 °C. The sample was shaken gently while being titrated against standard KOH (0.1 M) to the first permanent pink colour using phenolphthalein as indicator. The colour must persist for 30 s.

$$\text{FFA\% (in terms of oleic acid)} = \frac{(V-B) \times N \times 28.2}{m}$$

V = volume of potassium hydroxide used in sample.

B = volume of potassium hydroxide used in blank sample.

N = Normality of potassium hydroxide

m = weight of sample, in g.

## 3. Determination of the composition of fatty acids in canola oil deodorizer distillate by GC method

0.1 mL canola oil deodorizer distillate was placed into 10 mL centrifugal tubes to which 2 mL of H<sub>2</sub>SO<sub>4</sub>–MeOH solution (1 v/v%) was added. The mixture was heated at 70 °C for 1 h. After cooling to room temperature, 3 mL of n-hexane and 2 mL of distilled water were added and mixed thoroughly. The extracts were removed and injected for GC analysis. Peaks are identified against fatty acid methyl esters (FAMES) standard purchased from sigma Aldrich (Supelco® 37 Component FAME Mix). Analysis of FAME products by GC–FID analysis was carried out using an Agilent 6890A. Operating conditions: temperature (°C): injector, 225; detector, 285; initial temp, 100 (hold 4 min); ramp, 3°C/min; final temp 240; hold 15 min; carrier gas, helium; flow rate, 0.75 mL/min; linear velocity, 18 cm/s; split ratio, 200:1. Capillary column.—SP2560 100 m x 0.25 mm with 0.20 µm.

#### 4. Preparation of quinoline-scaffold monophosphine (NP-1, NP-2) and naphthalene-scaffold monophosphine (CP-1, CP-2) ligands

Synthetic pathway for NP ligands

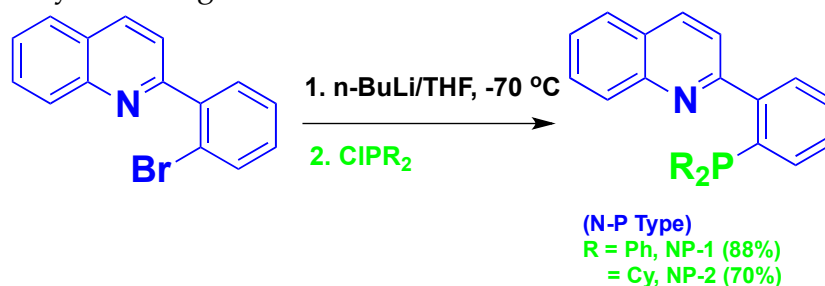

2-(2-Bromophenyl)quinoline

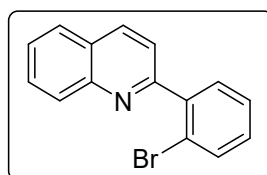

Synthesis of 2-(2-Bromophenyl)quinoline was according to literature procedure.<sup>[2]</sup>  $^1\text{H}$  NMR (400 MHz,  $\text{CDCl}_3$ )  $\delta$  7.30 (td,  $J = 1.6\text{Hz}$ ,  $7.6\text{Hz}$ , 1H), 7.45 (t,  $J = 7.5\text{Hz}$ , 1H), 7.58 (t,  $J = 7.5\text{Hz}$ , 1H), 7.65 (dd,  $J = 1.5\text{Hz}$ ,  $7.6\text{Hz}$ , 1H), 7.71 (d,  $J = 8.8\text{Hz}$ , 2H), 7.75 (t,  $J = 7.6\text{Hz}$ , 1H), 7.87 (d,  $J = 8.2\text{Hz}$ , 1H) 8.21 (t,  $J = 8.3\text{Hz}$ , 2H);  $^{13}\text{C}$  NMR (100 MHz,  $\text{CDCl}_3$ )  $\delta$  121.8, 126.4, 126.8, 127.1, 127.5, 127.7, 129.5, 129.7, 130.0, 131.6, 133.2, 135.7, 141.5, 147.8, 158.6; MS (EI):  $m/z$  (relative intensity) 283.1 ( $\text{M}^+$ , 50), 204.2 (100), 176.2 (25), 102.1 (32)

(2-(Quinoline-2-yl)phenyl)diphenylphosphine, **NP-1**

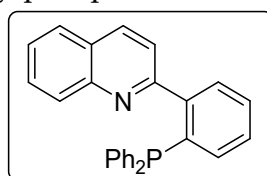

2-(2-Bromophenyl)quinoline (0.849 g, 3.0 mmol) was dissolved in freshly distilled THF (20 mL) at room temperature under a nitrogen atmosphere. The solution was cooled to  $-78\text{ }^{\circ}\text{C}$  in dry ice/acetone bath. Titrated  $n\text{-BuLi}$  (3.3 mmol) was added dropwise by syringe. After the reaction mixture was stirred for 30 min at  $-78\text{ }^{\circ}\text{C}$ , chlorodiphenylphosphine (0.66 mL, 3.3 mmol) in THF (5 mL) was added. The reaction was allowed to warm to room temperature and stirred overnight. Solvent was removed under reduced pressure. After



the solvent was removed under vacuum, the product was successively washed with cold MeOH/EtOH mixture. The product was then dried under vacuum. Pale yellow solid of (2-(Quinoline-2-yl)phenyl)diphenylphosphine **NP-1** (1.03 g, 88 %) were obtained. Melting point. 162.6-163.3 °C;  $^1\text{H}$  NMR (400 MHz,  $\text{CD}_2\text{Cl}_2$ )  $\delta$  7.21 (dd,  $J=3.4\text{Hz}$ ,  $7.9\text{Hz}$ , 1H), 7.31-7.42 (m, 11H), 7.55 (t,  $J=8.0\text{Hz}$ , 2H), 7.59-7.67 (m, 2H), 7.76 (d,  $J=8.3\text{Hz}$ , 1H), 7.83-7.88 (m, 2H), 8.21 (d,  $J=8.3\text{Hz}$ , 1H);  $^{13}\text{C}$  NMR (100 MHz,  $\text{CD}_2\text{Cl}_2$ )  $\delta$  121.3, 126.4, 126.6, 127.4, 128.1 (d,  $J=4.0\text{Hz}$ ), 128.2, 128.5, 128.6, 128.9, 129.3 (d,  $J=4.0\text{Hz}$ ), 129.4, 133.8 (d,  $J=19.8\text{Hz}$ ), 135.4, 135.9, 137.1 (d,  $J=18.8\text{Hz}$ ), 139.4 (d,  $J=11.1\text{Hz}$ ), 145.7 (d,  $J=23.3\text{Hz}$ ), 146.9, 158.3;  $^{31}\text{P}$  NMR (162 MHz,  $\text{CD}_2\text{Cl}_2$ )  $\delta$  -10.86; MS (EI):  $m/z$  (relative intensity) 389.3 ( $\text{M}^+$ , 23), 312.2 (100), 235.2 (35), 194.7 (7); HRMS: calcd. for  $\text{C}_{27}\text{H}_{21}\text{NP}^+$ : 390.1412, found 390.1403.

(2-(Quinoline-2-yl)phenyl)dicyclohexylphosphine, **NP-2**

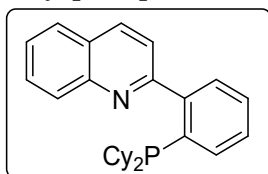

2-(2-Bromophenyl)quinoline (0.849 g, 3.0 mmol) was dissolved in freshly distilled THF (20 mL) at room temperature under a nitrogen atmosphere. The solution was cooled to -78 °C in dry ice/acetone bath. Titrated *n*-BuLi (3.3 mmol) was added dropwise by syringe. After the reaction mixture was stirred for 30 min at -78 °C, chlorodicyclohexylphosphine (0.72 mL, 3.3 mmol) in THF (5 mL) was added. The reaction was allowed to warm to room temperature and stirred overnight. Solvent was removed under reduced pressure. After the solvent was removed under vacuum, the product was successively washed with cold MeOH/EtOH mixture. The product was then dried under vacuum. White solid of (2-(Quinoline-2-yl)phenyl)dicyclohexylphosphine **NP-2** (0.84 g, 70 %) were obtained. Melting point. 136.6-137.2 °C;  $^1\text{H}$  NMR (400 MHz,  $\text{CD}_2\text{Cl}_2$ )  $\delta$  1.09-1.32 (m, 10H), 1.63-1.76 (m, 10H), 1.99 (td,  $J=3.0\text{Hz}$ ,  $12.0\text{Hz}$ , 2H), 7.48-7.52 (m, 2H), 7.56-7.62 (m, 3H), 7.70-7.73 (m, 1H), 7.76 (td,  $J=1.3\text{Hz}$ ,  $7.2\text{Hz}$ , 1H), 7.91 (d,  $J=8.2\text{Hz}$ , 1H), 8.12 (d,  $J=8.2\text{Hz}$ , 1H), 8.18 (d,  $J=8.2\text{Hz}$ , 1H);  $^{13}\text{C}$  NMR (100 MHz,  $\text{CD}_2\text{Cl}_2$ )  $\delta$  26.4, 27.1 (d,  $J=7.0\text{Hz}$ ), 27.2 (d,  $J=4.3\text{Hz}$ ), 29.7 (d,  $J=10.5\text{Hz}$ ), 30.3 (d,  $J=17.5\text{Hz}$ ), 34.5 (d,  $J=13.4\text{Hz}$ ), 124.3 (d,  $J=6.6\text{Hz}$ ), 126.2, 126.7, 127.5 (d,  $J=2.7\text{Hz}$ ), 128.3, 129.3 (d,  $J=16.6\text{Hz}$ ), 129.8 (d,  $J=5.0\text{Hz}$ ), 132.9 (d,  $J=2.0\text{Hz}$ ), 134.2, 134.7 (d,  $J=23.6\text{Hz}$ ), 147.6, 149.3 (d,  $J=27.3\text{Hz}$ ), 161.0 (d,  $J=4.9\text{Hz}$ );  $^{31}\text{P}$  NMR (162 MHz,  $\text{CD}_2\text{Cl}_2$ )  $\delta$  -11.01; MS (EI):  $m/z$  (relative intensity) 401.4 ( $\text{M}^+$ , 2), 318.3 (100), 235.2 (43). HRMS: calcd. for  $\text{C}_{27}\text{H}_{33}\text{NP}^+$ : 402.2351, found 402.2342.

## Synthetic pathway for CP ligands

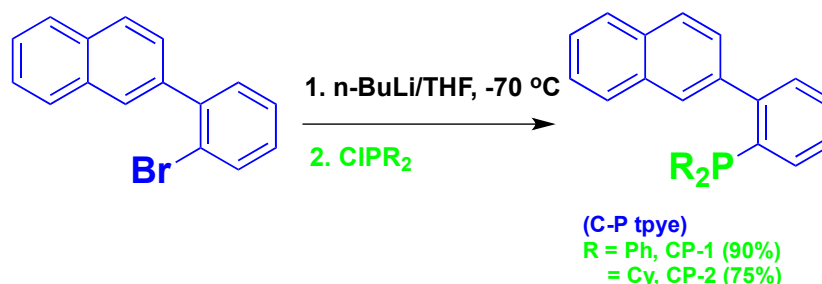(2-(Naphthalene-2-yl)phenyl)diphenylphosphine, **CP-1**<sup>[3]</sup>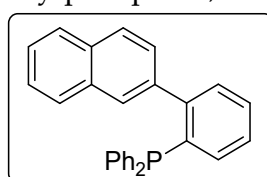

2-(2-Bromophenyl)naphthalene (0.849 g, 3.0 mmol) was dissolved in freshly distilled THF (20 mL) at room temperature under a nitrogen atmosphere. The solution was cooled to -78 °C in dry ice/acetone bath. Titrated *n*-BuLi (3.3 mmol) was added dropwise by syringe. After the reaction mixture was stirred for 30 min at -78 °C, chlorodiphenylphosphine (0.66 mL, 3.3 mmol) in THF (5 mL) was added. The reaction was allowed to warm to room temperature and stirred overnight. Solvent was removed under reduced pressure. After the solvent was removed under vacuum, the product was successively washed with cold MeOH/EtOH mixture. The product was then dried under vacuum. White solid of (2-(Naphthalene-2-yl)phenyl)diphenylphosphine **CP-1** (1.05 g, 90 %) were obtained. <sup>1</sup>H NMR (400 MHz, CD<sub>2</sub>Cl<sub>2</sub>) δ 7.14 (dd, *J* = 3.8 Hz, 7.6 Hz, 1H), 7.22-7.26 (m, 4H), 7.32-7.34 (m, 7H), 7.4-7.51 (m, 5H), 7.57 (s, 1H), 7.63 (d, *J* = 7.6 Hz, 1H), 7.78 (d, *J* = 8.2 Hz, 1H), 7.86 (d, *J* = 8.2 Hz, 1H); <sup>13</sup>C NMR (100 MHz, CD<sub>2</sub>Cl<sub>2</sub>) δ 125.8 (d, *J* = 10.0 Hz), 126.8, 127.3, 127.4, 127.8, 127.9 (d, *J* = 2.3 Hz), 128.2, 128.3, 128.4, 128.6, 130 (d, *J* = 5.0 Hz), 132.5 (d, *J* = 29.0 Hz), 133.6, 133.8, 134.1, 137.6, 137.7, 139.2, 148.1 (d, *J* = 27.0 Hz); <sup>31</sup>P NMR (162 MHz, CD<sub>2</sub>Cl<sub>2</sub>) δ -13.70; MS (EI): *m/z* (relative intensity) 387.3 (*M*<sup>+</sup>, 100), 309.2 (5), 233.2 (16).

(2-(Naphthalene-2-yl)phenyl)dicyclohexylphosphine, **CP-2**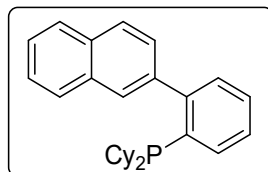

2-(2-Bromophenyl)naphthalene (0.849 g, 3.0 mmol) was dissolved in freshly distilled THF (20 mL) at room temperature under a nitrogen atmosphere. The solution was cooled to -78 °C in dry ice/acetone bath. Titrated *n*-BuLi (3.3 mmol) was added dropwise by syringe. After the reaction mixture was stirred for 30 min at -78 °C, chlorodicyclohexylphosphine (0.72 mL, 3.3 mmol) in THF (5 mL) was added. The reaction was allowed to warm to room temperature and stirred overnight. Solvent was removed under reduced pressure. After the solvent was removed under vacuum, the product was successively washed with cold MeOH/EtOH mixture. The product was then dried under vacuum. White solid of (2-(Naphthalene-2-yl)phenyl)dicyclohexylphosphine **CP-2** (0.90 g, 75 %) were obtained. Melting point. 128.6-129.8 °C; <sup>1</sup>H NMR (400 MHz, CD<sub>2</sub>Cl<sub>2</sub>) δ 1.07-1.34 (m, 10H), 1.56-1.72 (m, 10H), 1.90 (t, *J* = 11.4 Hz, 2H), 7.39-7.46 (m, 3H), 7.49-7.55 (m, 3H), 7.69-7.71 (m, 1H), 7.76 (s, 1H), 7.86-7.93 (m, 3H); <sup>13</sup>C NMR (100 MHz, CD<sub>2</sub>Cl<sub>2</sub>) δ 26.4, 27.1 (d, *J* = 4.0 Hz), 27.2, 29.4 (d, *J* = 9.3 Hz), 30.6 (d, *J* = 17.5 Hz), 34.9 (d, *J* = 17.4 Hz), 125.8 (d, *J* = 21.9 Hz), 126.2, 126.6, 127.7 (d, *J* = 33.0 Hz), 128.2, 129.0 (d, *J* = 3.0 Hz), 129.6 (d, *J* = 4.9 Hz), 130.2 (d, *J* = 4.9 Hz), 132.1, 132.9, 133.0 (d, *J* = 4.0 Hz), 134.5 (d, *J* = 22.9 Hz), 140.8 (d, *J* = 7.1 Hz), 150.4 (d, *J* = 30.3 Hz); <sup>31</sup>P NMR (162 MHz, CD<sub>2</sub>Cl<sub>2</sub>) δ -10.19; MS (EI): *m/z* (relative intensity) 399.4 (M<sup>+</sup>, 100), 317.3 (60), 233.2 (87), 202.2 (16). HRMS: calcd. for C<sub>28</sub>H<sub>34</sub>P<sup>+</sup>: 401.2398, found 401.2395.

## 5. Determination of fatty acid profile of canola oil deodorizer distillate by GC-FID

Figure S1: Determination of fatty acid profile of canola oil deodorizer by H<sub>2</sub>SO<sub>4</sub> catalyzed transesterification

File : C:\msdchem\3\data\alston\2018\20180215\H2SO4.D  
 Operator :  
 Acquired : 15 Feb 2018 16:15 using AcqMethod AOAC996.M  
 Instrument : GCFID  
 Sample Name: H2SO4  
 Misc Info :  
 Vial Number: 54

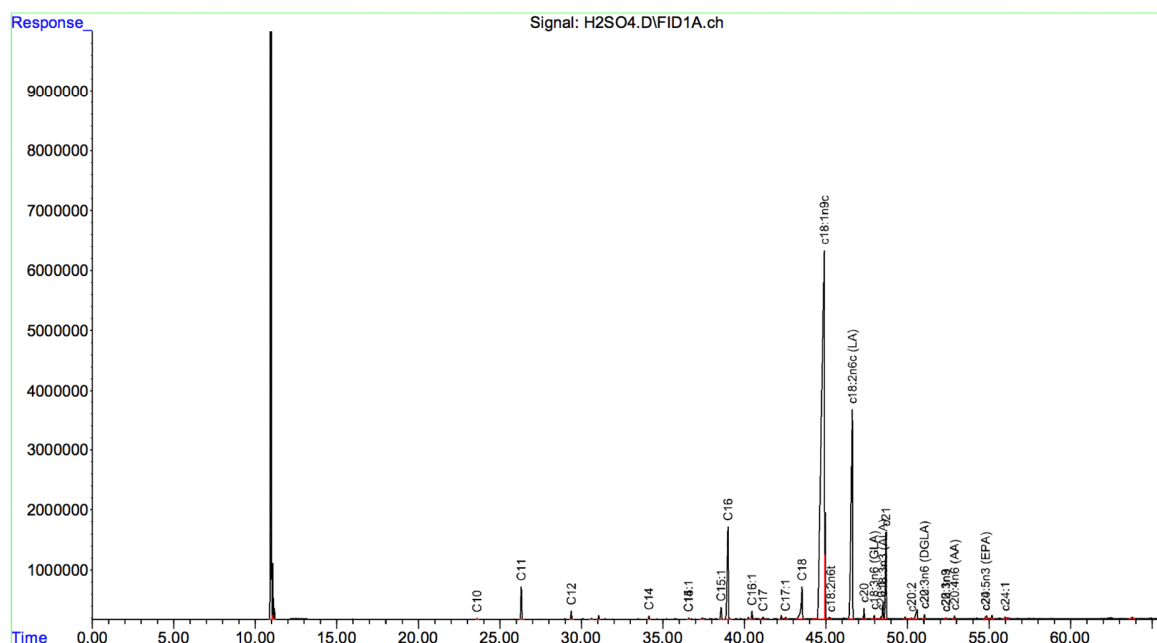

**Table S1: Fatty acids composition of canola oil deodorizer distillate determined by GC-FID**

|                                | H <sub>2</sub> SO <sub>4</sub> catalyzed transesterification |                                                           |                       |
|--------------------------------|--------------------------------------------------------------|-----------------------------------------------------------|-----------------------|
| Fatty acid                     | Weight of individual fatty acids, mg)                        | Weight of fatty acids in terms of carbon chain number, mg | Wt% of fatty acids, % |
| C11                            | 9.36                                                         | C11: 9.36                                                 | 1.05                  |
| C12                            | 2.22                                                         | C12: 2.22                                                 | 0.25                  |
| C14                            | 0.66                                                         | C14: 0.66                                                 | 0.07                  |
| C15                            | 0.23                                                         | C15: 3.34                                                 | 0.38                  |
| C15:1                          | 3.11                                                         |                                                           |                       |
| <b>C16</b>                     | <b>25.37</b>                                                 | <b>C16:</b> 26.9                                          | 3.02                  |
| C16:1                          | 1.53                                                         |                                                           |                       |
| C17                            | 0.44                                                         | C17: 0.73                                                 | 0.08                  |
| C17:1                          | 0.29                                                         |                                                           |                       |
| C18                            | 10.25                                                        | <b>C18:</b> 372.52                                        | <b>41.86</b>          |
| <b>C18:1 oleic acid</b>        | <b>261.94</b>                                                |                                                           |                       |
| C18:2                          | 77.03                                                        |                                                           |                       |
| C18:3                          | 3.04                                                         |                                                           |                       |
| C18:3                          | 20.26                                                        |                                                           |                       |
| C20                            | 1.74                                                         | C20: 6.22                                                 | 0.7                   |
| C20:1                          | 2.78                                                         |                                                           |                       |
| C20:2                          | 0.20                                                         |                                                           |                       |
| C20:3n6                        | 0.82                                                         |                                                           |                       |
| C20:3n3                        | 0.24                                                         |                                                           |                       |
| C20:4n6                        | 0.44                                                         |                                                           |                       |
| Total weight of fatty acid, mg | 424.94                                                       |                                                           |                       |
| Weight of sample, mg           | 890.00                                                       |                                                           |                       |
| <b>wt% of fatty acid, %</b>    | <b>47.75</b>                                                 |                                                           |                       |

Figure S2: Olefin product determined by GC-FID

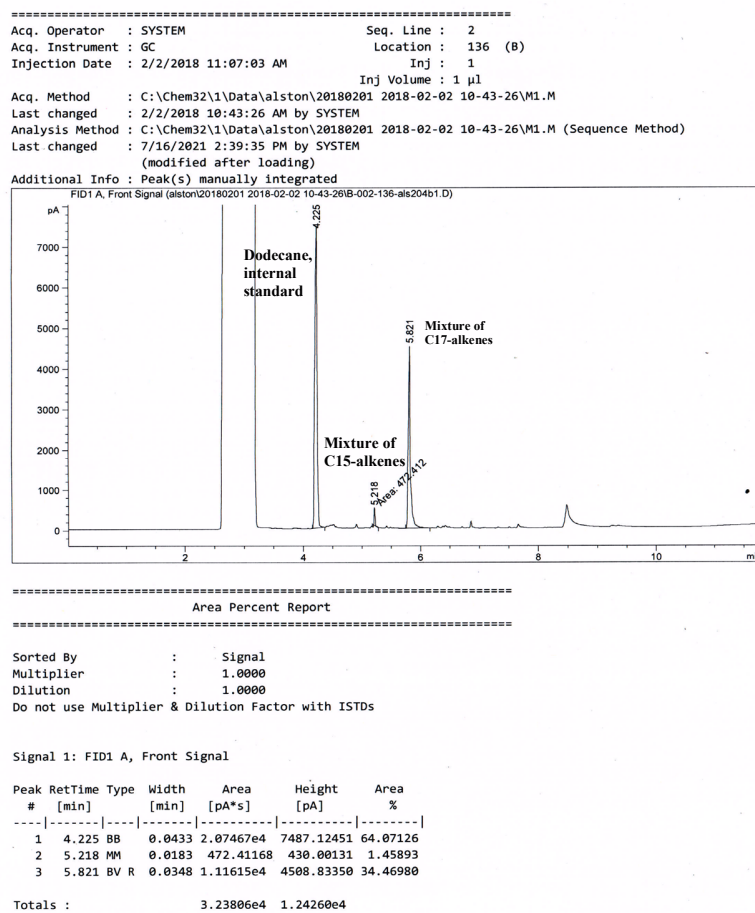

**Figure S3: Olefin product determined by GC-MS**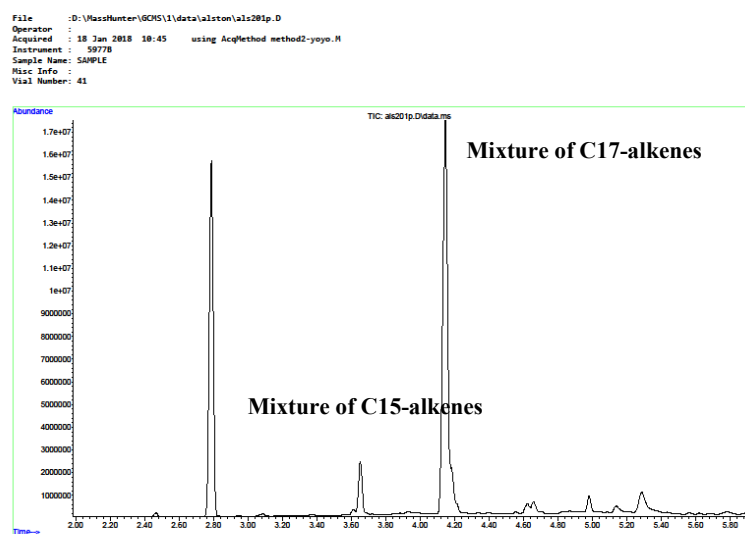

Figure S4: GCMS spectrum of mixture of C15-alkenes at retention time 3.6 min.

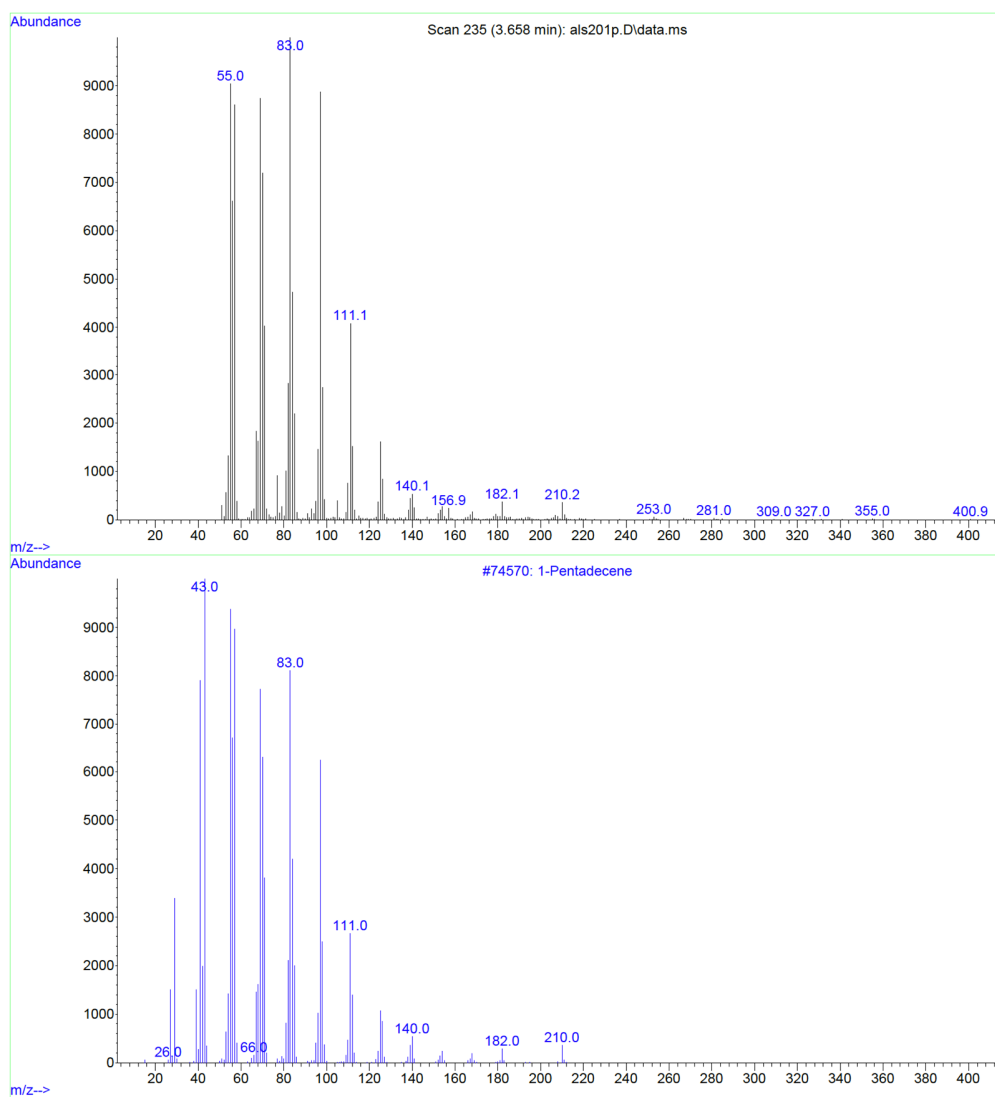



Figure S5: GCMS spectrum of mixture of C17-alkenes at retention time 4.5 min

File :D:\MassHunter\GCMS\1\data\alston\als201p.D  
Operator :  
Acquired : 18 Jan 2018 10:45 using AcqMethod method2-yoyo.M  
Instrument : 5977B  
Sample Name: SAMPLE  
Misc Info :  
Vial Number: 41

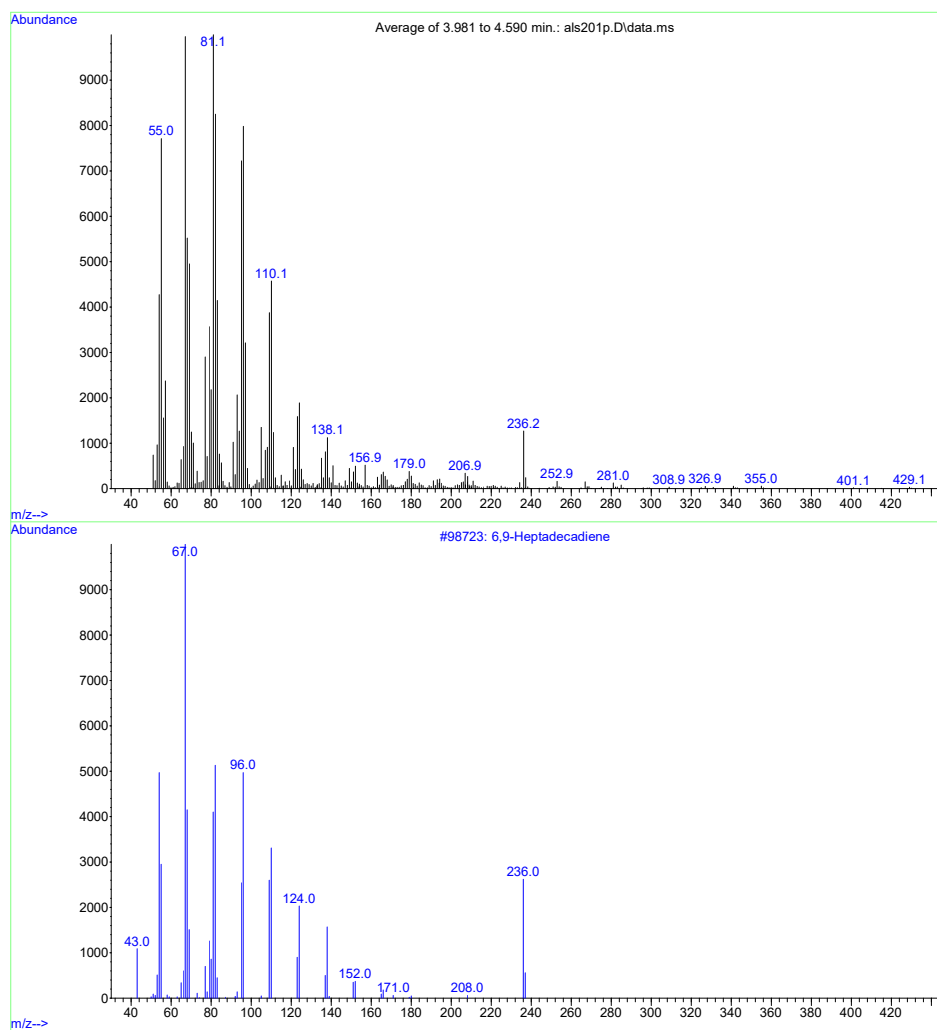

## 6. Characterization data for alkene products

### (Z)-Heptadeca-1,8-diene (Table 2, **2a**)<sup>4</sup>

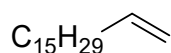

Eluents (Hexane,  $R_f$  0.7) was used for flash column chromatography.  $^1\text{H}$  NMR (400 MHz,  $\text{CDCl}_3$ )  $\delta$  5.76-5.86 (m, 1H), 5.34-5.37 (m, 2H), 4.92-5.02 (m, 2H), 2.03-2.06 (m, 6H), 1.28-1.39 (m, 18H), 0.89 (t,  $J$  = 7.9Hz, 3H);  $^{13}\text{C}$  NMR (100 MHz,  $\text{CDCl}_3$ )  $\delta$  139.0, 129.9, 129.7, 114.1, 33.7, 32.4, 31.9, 29.7, 29.6, 29.5, 29.3, 28.8, 28.7, 27.2, 27.1, 22.6, 14.0; MS (EI):  $m/z$  (relative intensity) 236.4 ( $\text{M}^+$ , 20), 138.2 (11), 124.2 (22), 109.2 (36), 96.2 (96), 81.2 (100), 67.2 (97), 55.2 (98).

### 1-Tridecene (Table 2, **2b**)<sup>5</sup>

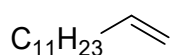

Eluents (Hexane,  $R_f$  0.7) was used for flash column chromatography.  $^1\text{H}$  NMR (400 MHz,  $\text{CDCl}_3$ )  $\delta$  5.77-5.87 (m, 1H), 5.00 (dd,  $J$  = 1.8Hz, 17.6Hz, 1H), 4.93 (d,  $J$  = 10.7Hz, 1H), 2.05 (q,  $J$  = 7.9Hz, 2H), 1.27 (s, 18H), 0.89 (t,  $J$  = 7.9Hz, 3H);  $^{13}\text{C}$  NMR (100 MHz,  $\text{CDCl}_3$ )  $\delta$  139.2, 114.0, 33.8, 31.9, 29.7, 29.68, 29.66, 29.5, 29.3, 29.2, 28.9, 22.7, 14.1; MS (EI):  $m/z$  (relative intensity) 182.4 ( $\text{M}^+$ , 9), 125.3 (10), 111.3 (35), 97.2 (80), 83.2 (96), 69.2 (95), 55.2 (100).

### 1-Pentadecene (Table 2, **2c**)<sup>5</sup>

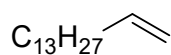

Eluents (Hexane,  $R_f$  0.7) was used for flash column chromatography.  $^1\text{H}$  NMR (400 MHz,  $\text{CDCl}_3$ )  $\delta$  5.78-5.85 (m, 1H), 5.01 (dd,  $J$  = 1.9Hz, 17.7Hz, 1H), 4.92 (d,  $J$  = 10.0Hz, 1H), 2.05 (q,  $J$  = 7.4Hz, 2H), 1.27 (s, 22H), 0.89 (t,  $J$  = 7.0Hz, 3H);  $^{13}\text{C}$  NMR (100 MHz,  $\text{CDCl}_3$ )  $\delta$  139.2, 114.0, 33.8, 31.9, 29.7, 29.6, 29.5, 29.4, 29.2, 29.0, 22.7, 14.1; MS (EI):  $m/z$  (relative intensity) 210.4 ( $\text{M}^+$ , 7), 182.4 (5), 140.3 (7), 125.3 (17), 111.3 (46), 97.2 (95), 83.2 (100), 69.2 (87), 55.2 (93).

1-Heptadecene (Table 2, **2d**)<sup>5</sup>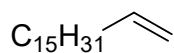

Eluents (Hexane,  $R_f = 0.7$ ) was used for flash column chromatography.  $^1\text{H}$  NMR (400 MHz,  $\text{CDCl}_3$ )  $\delta$  5.77-5.87 (m, 1H), 5.01 (dd,  $J = 1.9\text{Hz}$ ,  $17.1\text{Hz}$ , 1H), 4.93 (d,  $J = 10.0\text{Hz}$ , 1H), 2.05 (q,  $J = 7.0\text{Hz}$ , 2H), 1.27 (s, 26H), 0.89 (t,  $J = 7.2\text{Hz}$ , 3H);

$^{13}\text{C}$  NMR (100 MHz,  $\text{CDCl}_3$ )  $\delta$  139.2, 114.0, 33.8, 31.9, 29.7, 29.6, 29.5, 29.4, 29.2, 29.0, 22.7, 14.1; MS (EI):  $m/z$  (relative intensity) 238.5 ( $\text{M}^+$ , 7), 210.4 (5), 125.3 (28), 111.3 (57), 97.2 (100), 83.2 (98), 69.2 (78), 55.2 (85).

1-Allyl-4-methoxybenzene (Table 2, **2e**)<sup>6</sup>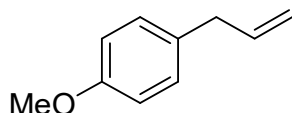

Eluents (Hexane: ethyl acetate 10:1,  $R_f = 0.6$ ) was used for flash column chromatography.  $^1\text{H}$  NMR (400 MHz,  $\text{CDCl}_3$ )  $\delta$  7.11 (d,  $J = 8.5\text{Hz}$ , 2H), 6.85 (d,  $J = 8.6\text{Hz}$ , 2H), 5.91-6.01 (m, 1H), 5.04-5.0 (m, 2H), 3.79 (s, 3H), 3.34 (d,  $J = 6.6\text{Hz}$ , 2H);  $^{13}\text{C}$  NMR (100 MHz,  $\text{CDCl}_3$ )  $\delta$  157.9, 137.8, 132.0, 129.4, 115.3, 113.8, 55.2, 39.3; MS (EI):  $m/z$  (relative intensity) 148.2 ( $\text{M}^+$ , 100), 133.1 (23), 121.1 (38), 105.1 (21), 91.1 (21), 77.1 (23).

1-Allyl-3,4-dimethoxybenzene (Table 2, **2f**)<sup>7</sup>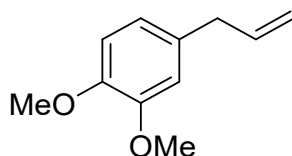

Eluents (Hexane: ethyl acetate 10:1,  $R_f = 0.3$ ) was used for flash column chromatography.  $^1\text{H}$  NMR (400 MHz,  $\text{CDCl}_3$ )  $\delta$  6.78-6.81 (m, 1H), 6.72 (d,  $J = 7.6\text{Hz}$ , 2H), 5.91-5.99 (m, 1H), 5.05-5.10 (m, 2H), 3.86 (s, 3H), 3.85 (s, 3H), 3.33 (d,  $J = 6.6\text{Hz}$ , 2H);  $^{13}\text{C}$  NMR (100 MHz,  $\text{CDCl}_3$ )  $\delta$  148.8, 147.3, 137.6, 134.4, 120.3, 115.5, 111.8, 111.2, 55.8, 55.7, 39.7; MS (EI):  $m/z$  (relative intensity) 178.2 ( $\text{M}^+$ , 100), 163.1 (30), 147.1 (30), 103.1 (25), 91.1 (25), 77.1 (20).

4-Phenyl-1-butene (Table 2, **2g**)<sup>8</sup>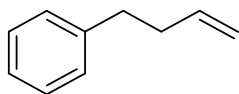

Eluents (Hexane,  $R_f$  = 0.6) was used for flash column chromatography.  $^1\text{H}$  NMR (400 MHz,  $\text{CDCl}_3$ )  $\delta$  7.28-7.32 (m, 2H), 7.20-7.22 (m, 3H), 5.83-5.93 (m, 1H), 5.06 (dd,  $J$  = 1.8Hz, 17.3Hz, 1H), 4.99 (d,  $J$  = 10.2Hz, 1H), 2.73 (t,  $J$  = 7.6Hz, 2H), 2.40 (m, 2H);  $^{13}\text{C}$  NMR (100 MHz,  $\text{CDCl}_3$ )  $\delta$  141.8, 138.0, 128.4, 128.2, 125.7, 114.8, 35.4, 35.3; MS (EI):  $m/z$  (relative intensity) 132.1 ( $\text{M}^+$ , 20), 91.1 (100).

4-(4-Fluorophenyl)-1-butene (Table 2, **2h**)<sup>9</sup>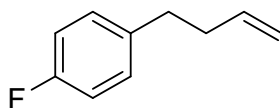

Eluents (Hexane,  $R_f$  = 0.5) was used for flash column chromatography.  $^1\text{H}$  NMR (400 MHz,  $\text{CDCl}_3$ )  $\delta$  7.11-7.14 (m, 2H), 6.96 (t,  $J$  = 8.6Hz, 2H), 5.78-5.88 (m, 1H), 4.97-5.05 (m, 2H), 2.68 (t,  $J$  = 7.7Hz, 2H), 2.34 (m, 2H);  $^{13}\text{C}$  NMR (100 MHz,  $\text{CDCl}_3$ )  $\delta$  161.2 (d,  $J$  = 243.0Hz), 137.7, 137.3 (d,  $J$  = 3.0Hz), 129.6 (d,  $J$  = 7.9Hz), 115.0 (d,  $J$  = 4.3Hz), 114.8, 35.5, 34.5; MS (EI):  $m/z$  (relative intensity) 150.2 ( $\text{M}^+$ , 14), 109.2 (100), 83.2 (7).

1-Allyl-pyrene (Table 2, **2i**)<sup>10</sup>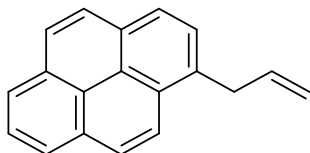

Eluents (Hexane,  $R_f$  = 0.5) was used for flash column chromatography.  $^1\text{H}$  NMR (400 MHz,  $\text{CDCl}_3$ )  $\delta$  8.03-8.30 (m, 8H), 7.92 (d,  $J$  = 7.5Hz, 1H), 6.26-6.36 (m, 1H), 5.17-5.27 (m, 2H), 4.15 (d,  $J$  = 6.6Hz, 2H);  $^{13}\text{C}$  NMR (100 MHz,  $\text{CDCl}_3$ )  $\delta$  137.2, 133.7, 131.2, 130.7, 129.9, 128.8,

127.38, 127.35, 127.2, 127.1, 126.6, 125.6, 124.9, 124.8, 124.7, 123.4, 116.0, 37.5; MS (EI):  $m/z$  (relative intensity) 242.2 ( $M^+$ , 100), 227.2(29), 215.2 (33), 119.9 (20).

7.  $^1\text{H}$ ,  $^{13}\text{C}$ ,  $^{31}\text{P}$  NMR, MS and HRMS spectra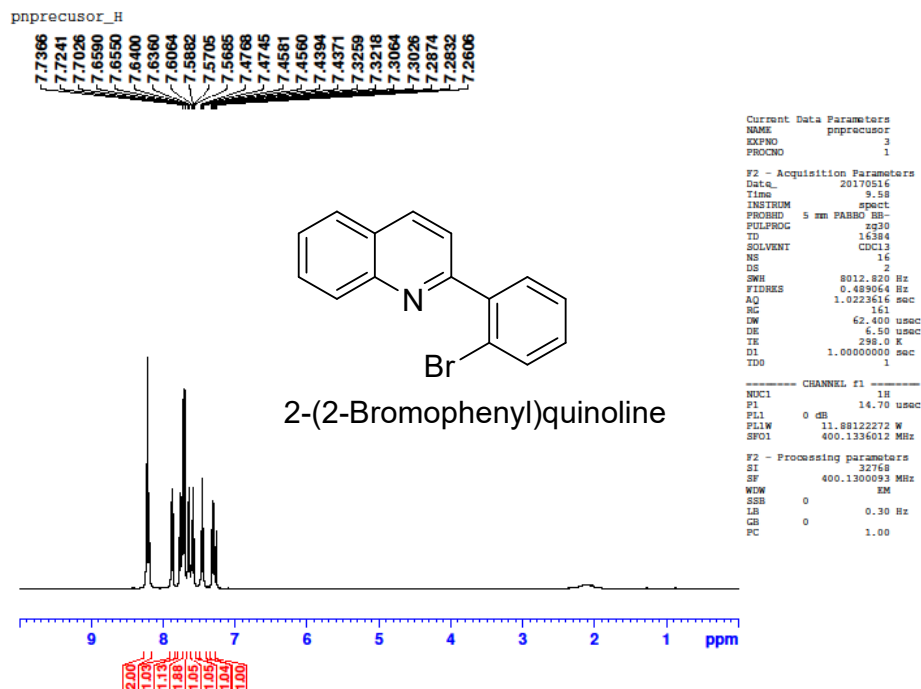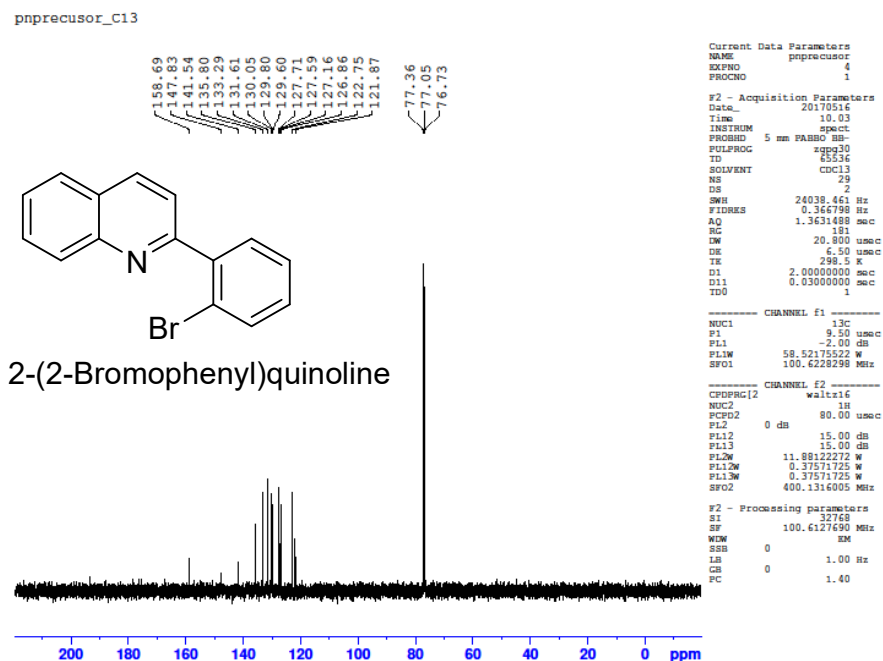

File :D:\MassHunter\GCMS\1\data\alston\pnpre.D  
Operator : duan  
Acquired : 18 May 2017 10:38 using AcqMethod M1.M  
Instrument : 5977  
Sample Name: pnpre  
Misc Info :  
Vial Number: 5

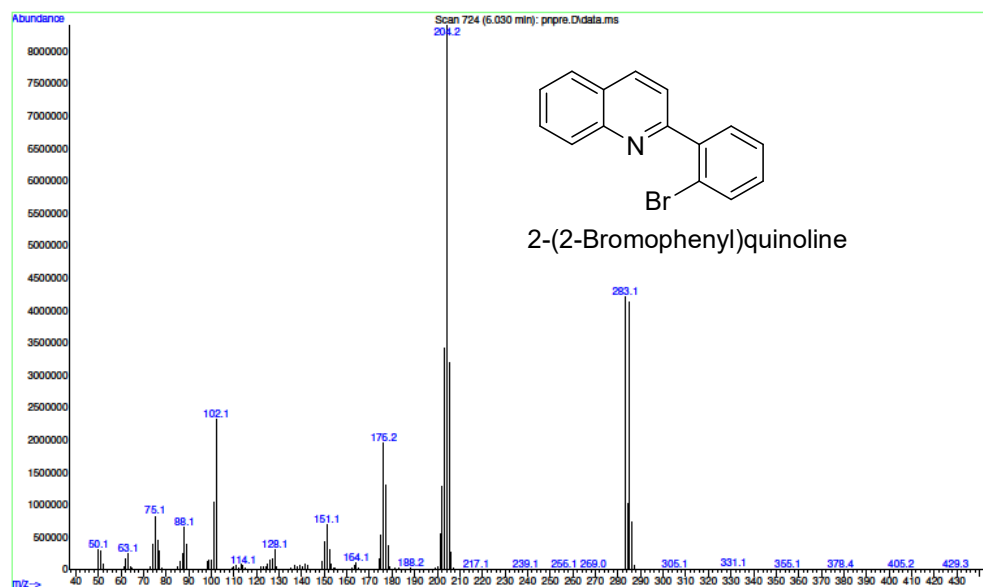

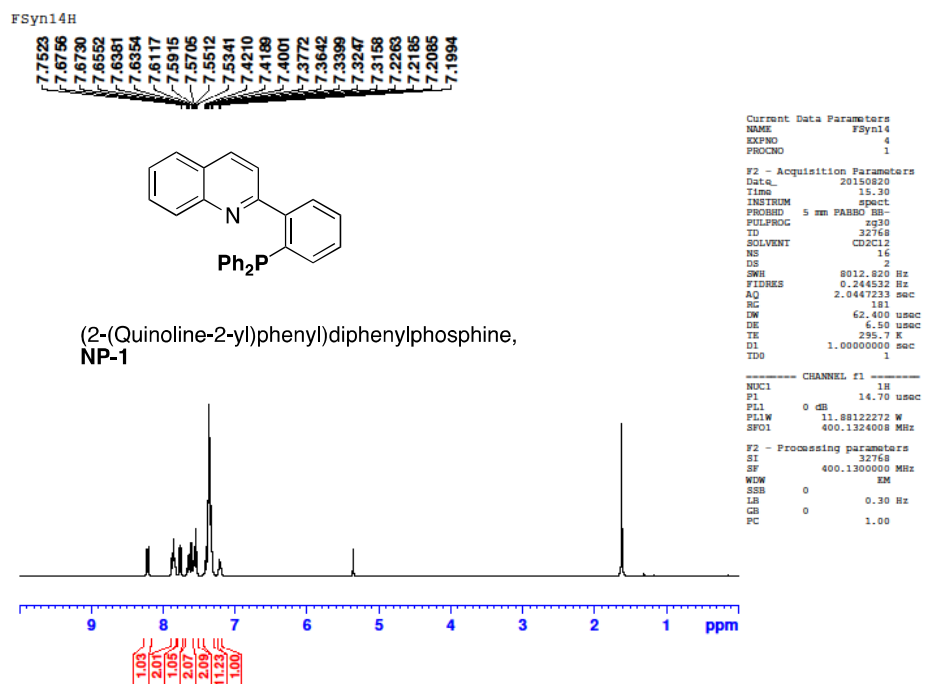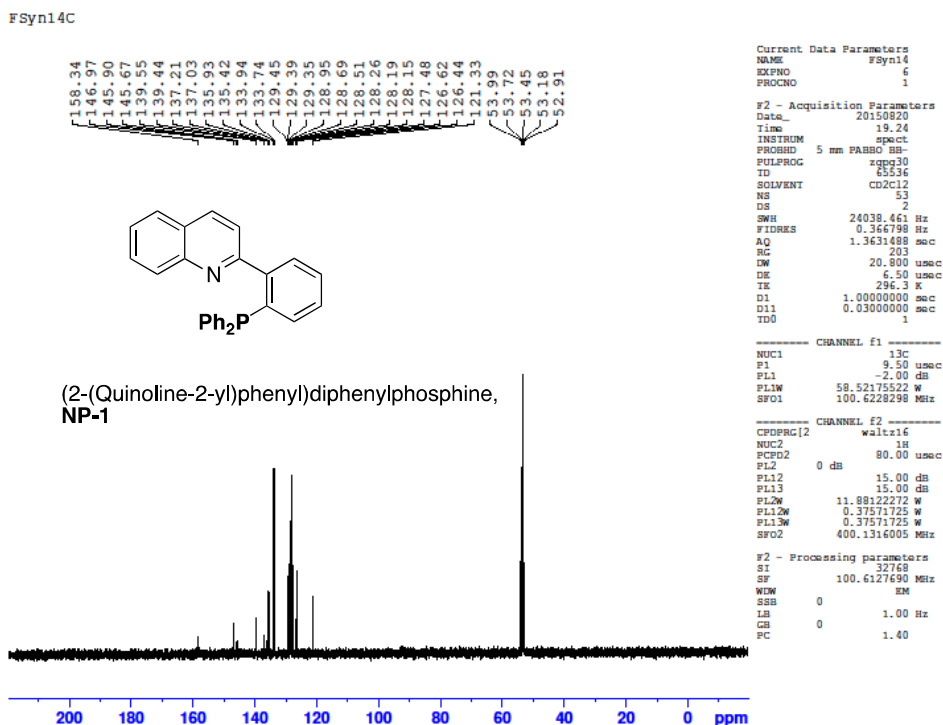



FSyn14P

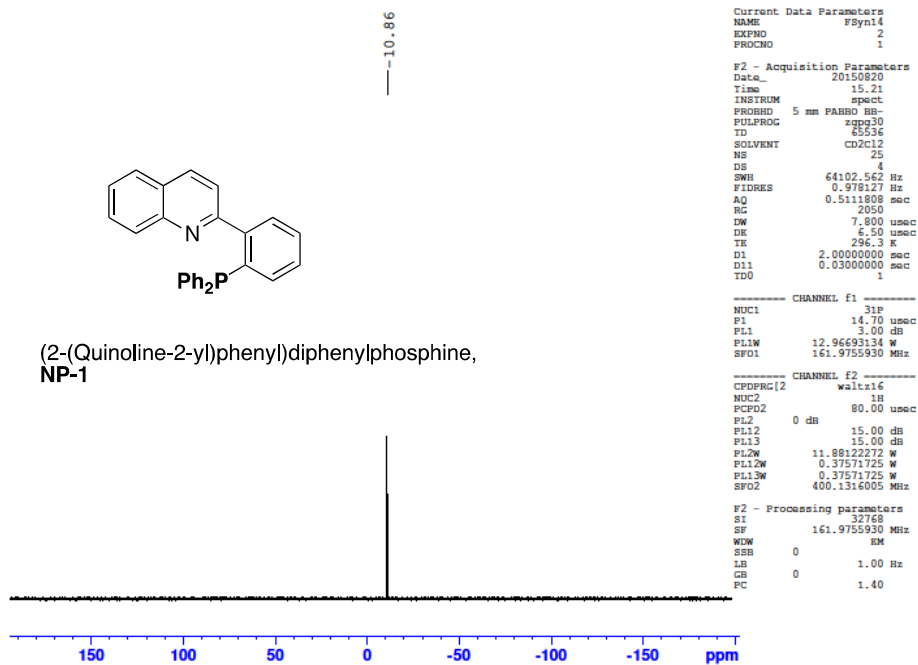

File :D:\MassHunter\GCMS\1\data\alston\pn1.D  
 Operator : duan  
 Acquired : 12 May 2017 11:08 using AcqMethod M3.M  
 Instrument : 5977  
 Sample Name: pn1  
 Misc Info :  
 Vial Number: 7

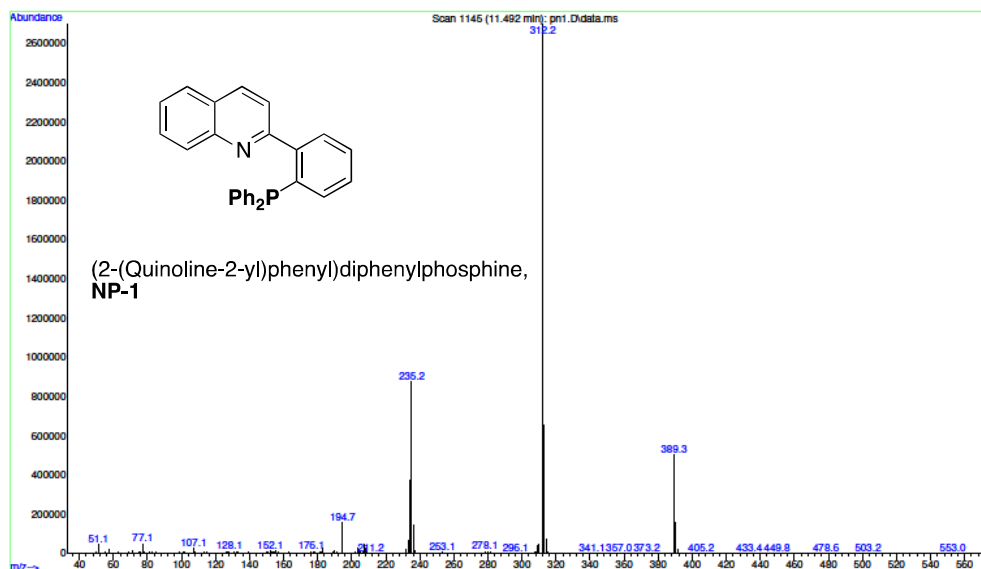

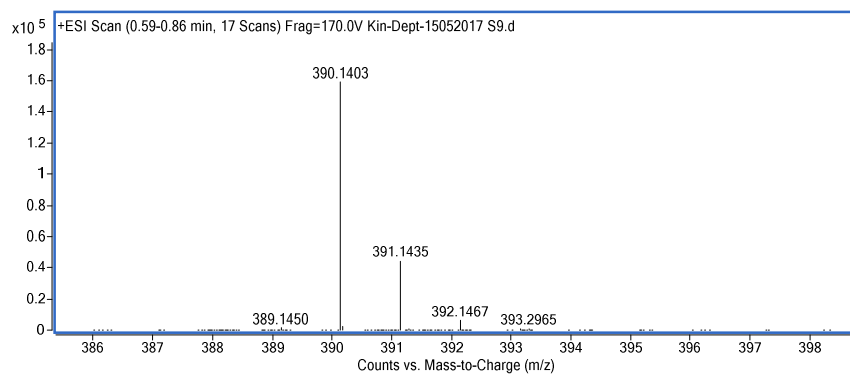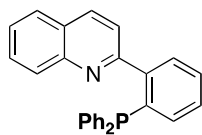

(2-(Quinoline-2-yl)phenyl)diphenylphosphine,  
**NP-1**

| Mass     | Calc. Mass | mDa  | PPM  | Formula                             |
|----------|------------|------|------|-------------------------------------|
| 390.1403 | 390.1412   | -0.9 | -2.2 | C <sub>27</sub> H <sub>21</sub> N P |

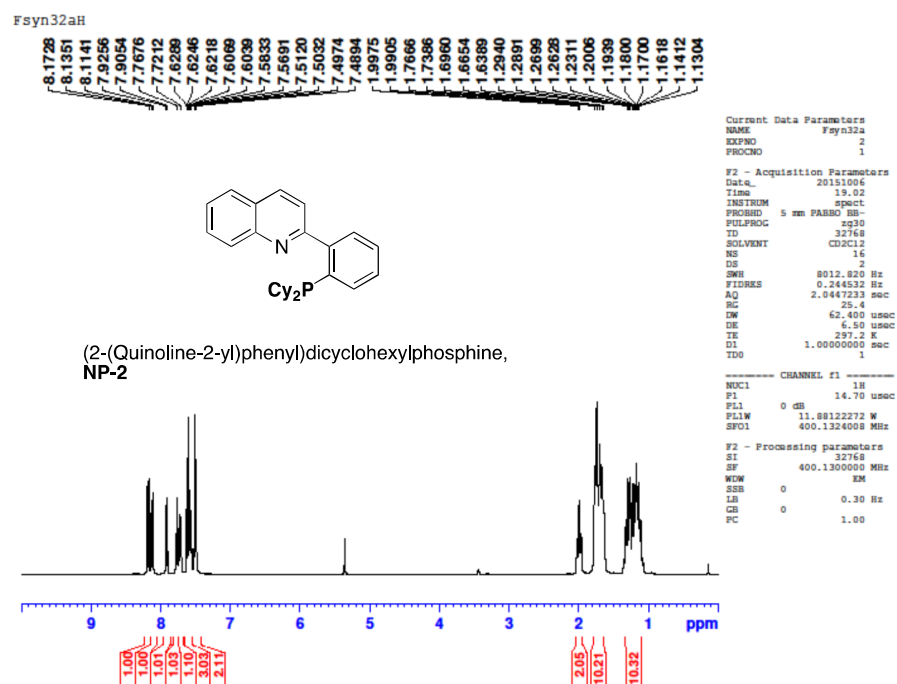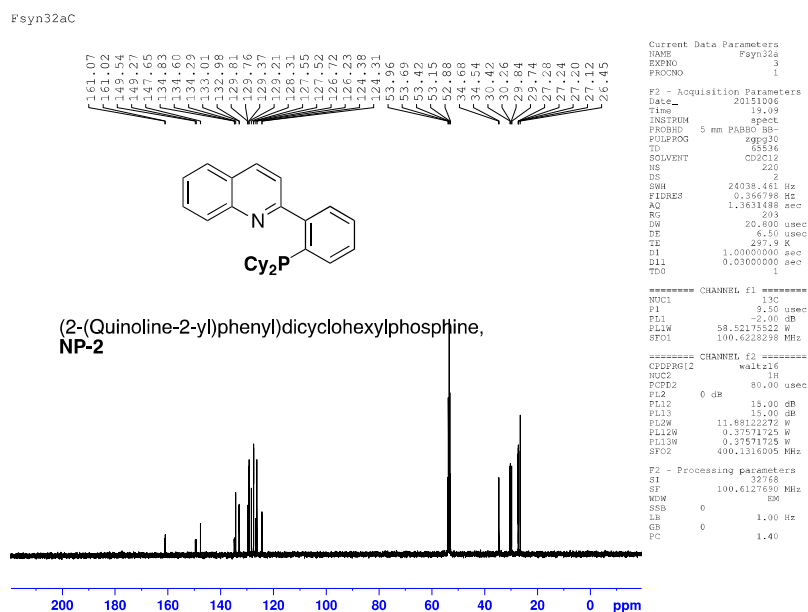

Fsyn32aP

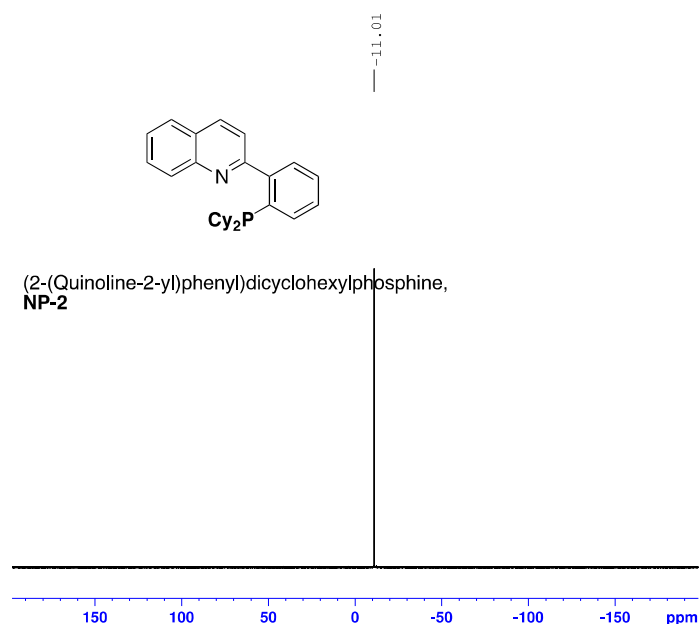

Current Data Parameters

| NAME   | Fsyn32a |
|--------|---------|
| EXPNO  | 1       |
| PROCNO | 1       |

F2 - Acquisition Parameters

| Date_   | 20151006       |
|---------|----------------|
| Time    | 18.59          |
| INSTRUM | spect          |
| PROBHD  | 5 mm PABBO BB- |
| PULPROG | zgpg30         |
| TD      | 65536          |
| SOLVENT | CDCl3          |
| NS      | 35             |
| DS      | 4              |
| SWH     | 64102.562 Hz   |
| FIDRES  | 0.978127 Hz    |
| AQ      | 0.5111808 sec  |
| RG      | 2050           |
| DW      | 7.800 usec     |
| DE      | 6.50 usec      |
| TE      | 297.0 K        |
| D1      | 2.00000000 sec |
| D11     | 0.03000000 sec |
| TDO     | 1              |

===== CHANNEL f1 =====

| NUC1 | 31P             |
|------|-----------------|
| P1   | 14.70 usec      |
| PL1  | 3.00 dB         |
| PL1W | 12.36653134 W   |
| SFO1 | 161.9755930 MHz |

===== CHANNEL f2 =====

| CPDPRG2 | waltz16         |
|---------|-----------------|
| NUC2    | 1H              |
| P2P2    | 80.00 usec      |
| PL2     | 0 dB            |
| PL12    | 15.00 dB        |
| PL13    | 15.00 dB        |
| PL2W    | 11.88122272 W   |
| PL12W   | 0.37571725 W    |
| PL13W   | 0.37571725 W    |
| SFO2    | 400.1316005 MHz |

F2 - Processing parameters

| SF  | 32768           |
|-----|-----------------|
| SE  | 161.9755930 MHz |
| WDW | EM              |
| SSB | 0               |
| LB  | 1.00 Hz         |
| GB  | 0               |
| PC  | 1.40            |

File :D:\MassHunter\GCMS\1\data\alston\pn2.D  
 Operator : dman  
 Acquired : 12 May 2017 11:32 using AcqMethod M3.M  
 Instrument : 5977  
 Sample Name: pn2  
 Misc Info :  
 Vial Number: 8

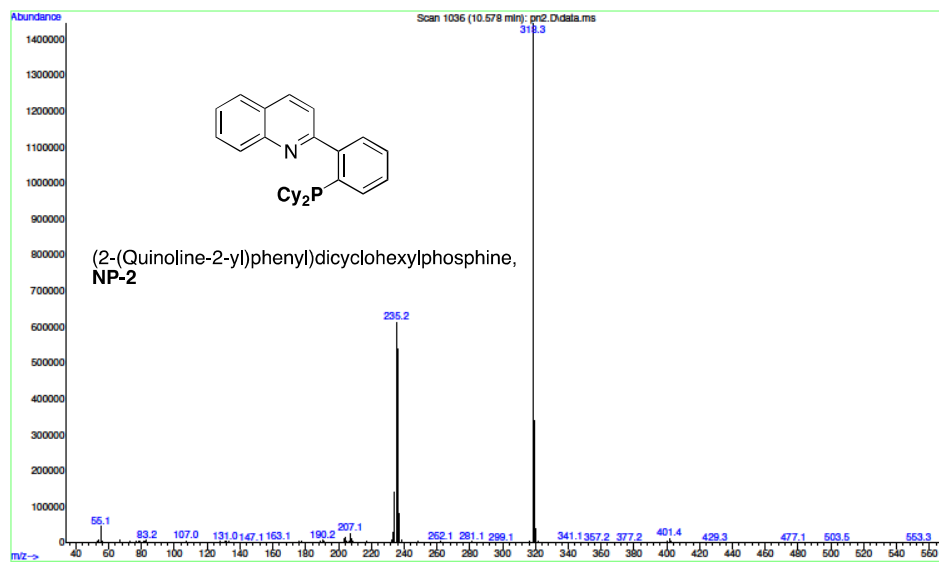

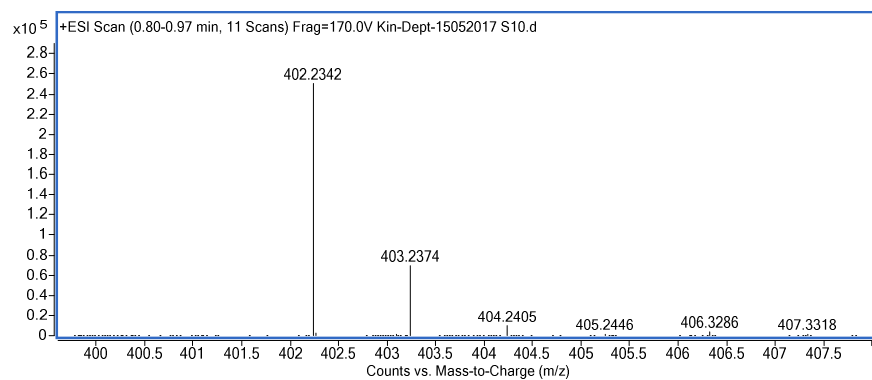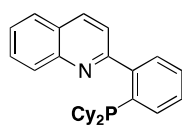

(2-(Quinoline-2-yl)phenyl)dicyclohexylphosphine,  
**NP-2**

| Mass     | Calc. Mass | mDa  | PPM  | Formula                             |
|----------|------------|------|------|-------------------------------------|
| 402.2342 | 402.2351   | -0.9 | -2.1 | C <sub>27</sub> H <sub>33</sub> N P |

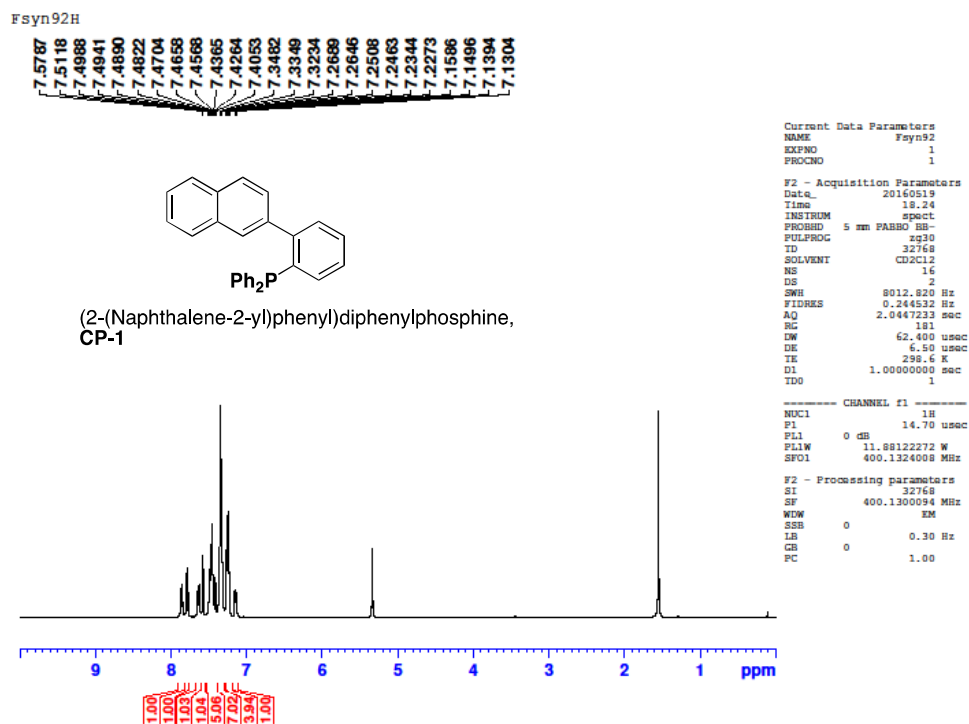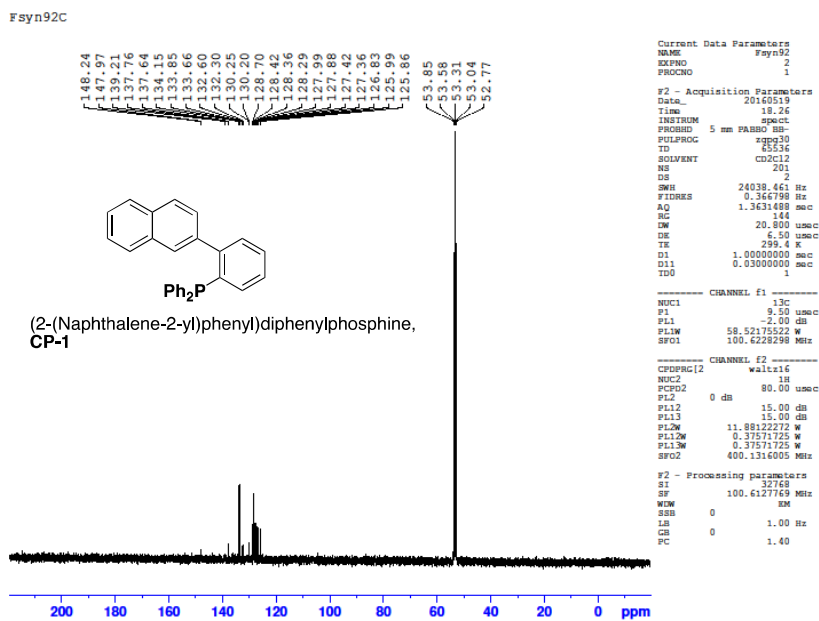

Fsyn92P

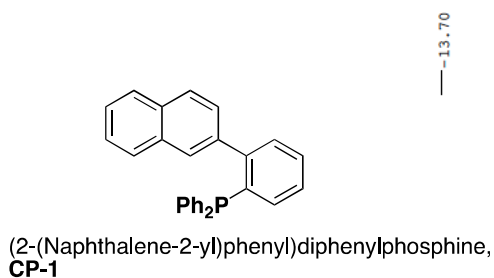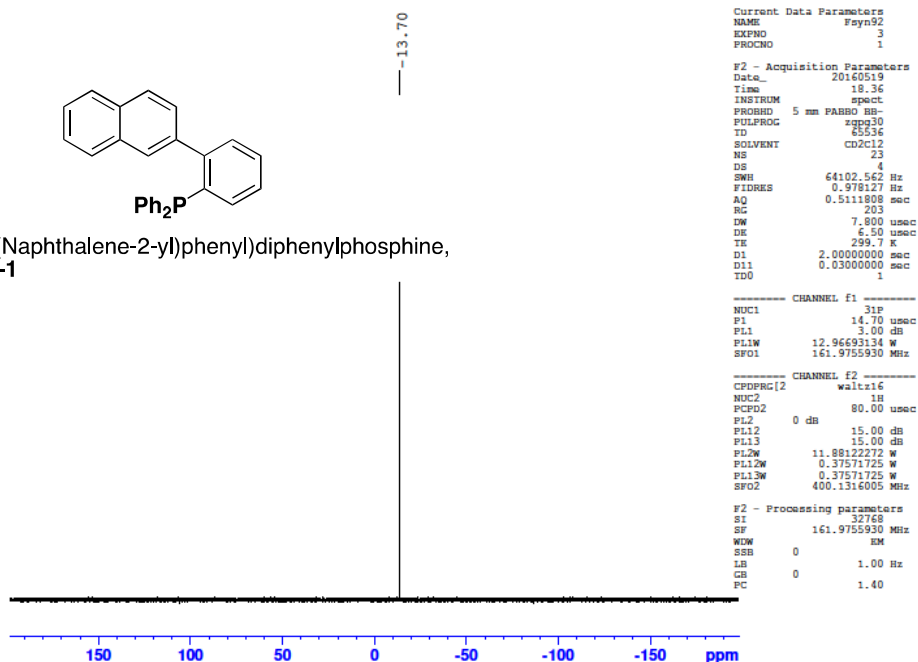

File :D:\MassHunter\GCMS\1\data\alston\pc1.D  
Operator : duan  
Acquired : 12 May 2017 11:55 using AcqMethod M3.M  
Instrument : 5977  
Sample Name: pc1  
Misc Info :  
Vial Number: 9

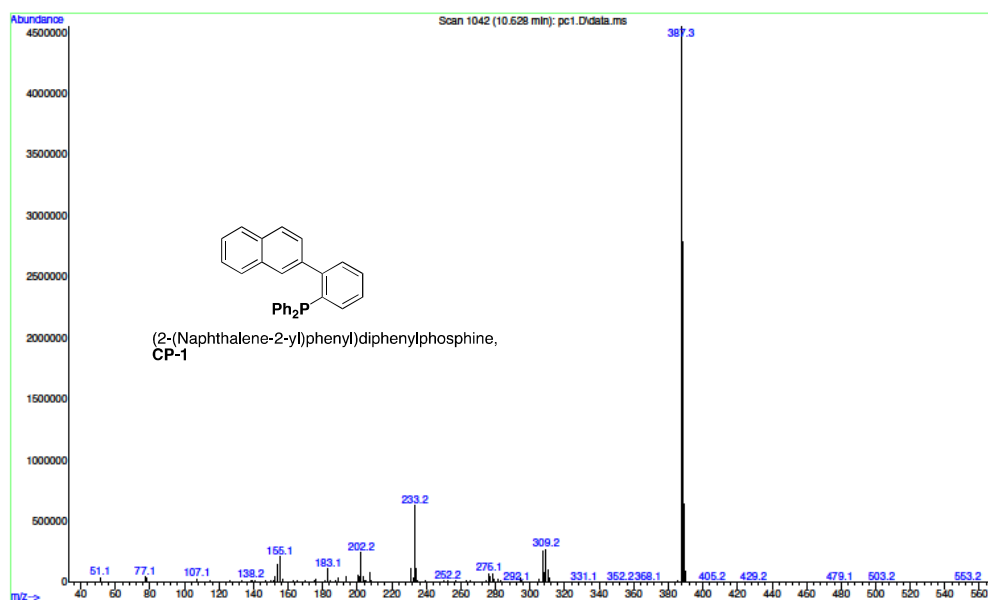

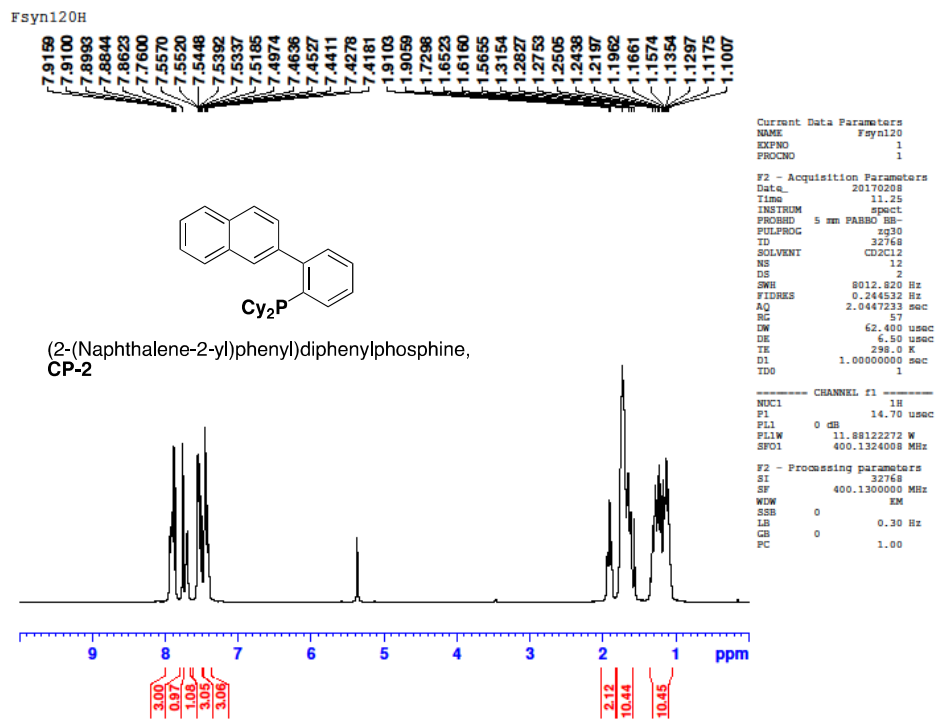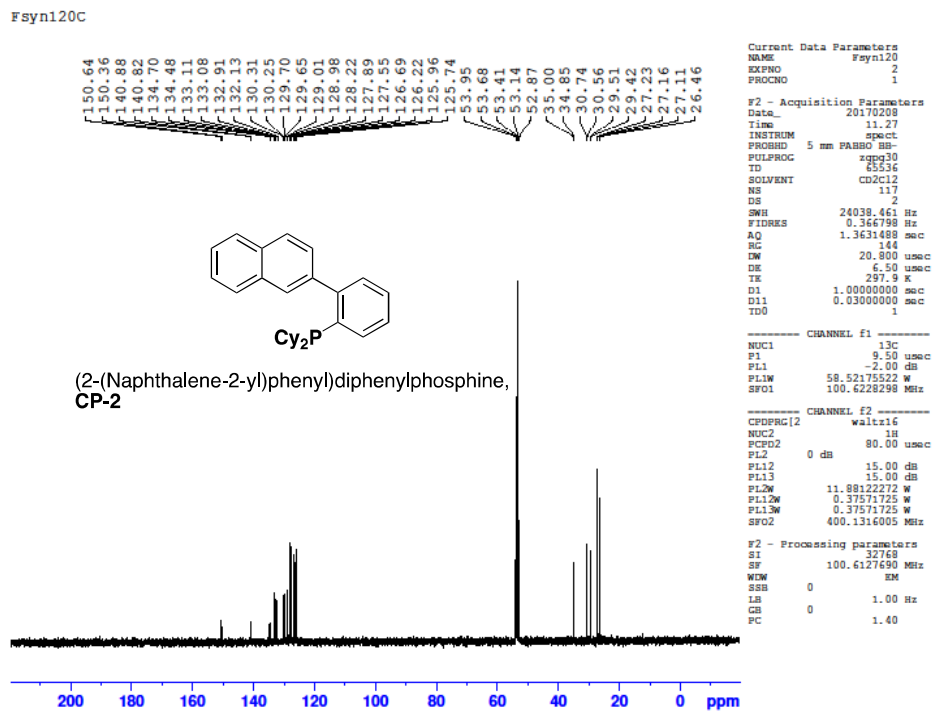



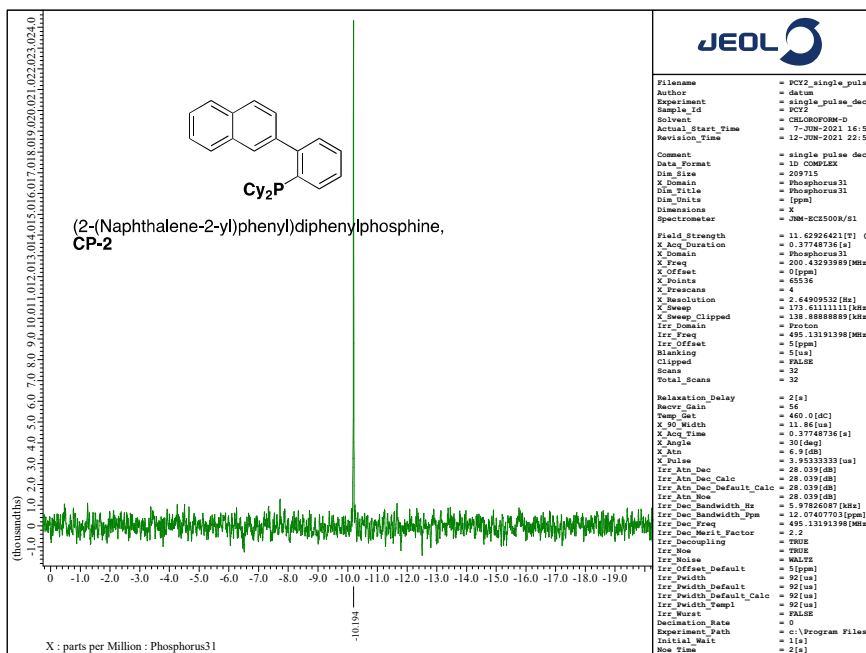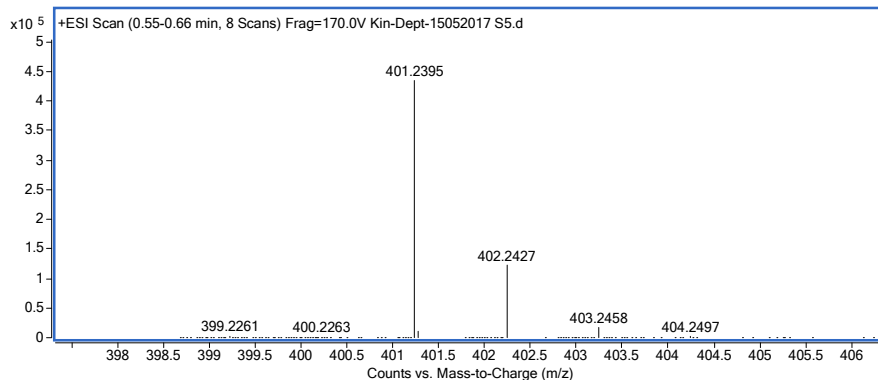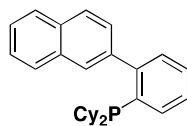

**(2-(Naphthalene-2-yl)phenyl)diphenylphosphine, CP-2**

| Mass     | Calc. Mass | mDa  | PPM  | Formula                           |
|----------|------------|------|------|-----------------------------------|
| 401.2395 | 401.2398   | -0.3 | -0.7 | C <sub>28</sub> H <sub>34</sub> P |

als175a\_H

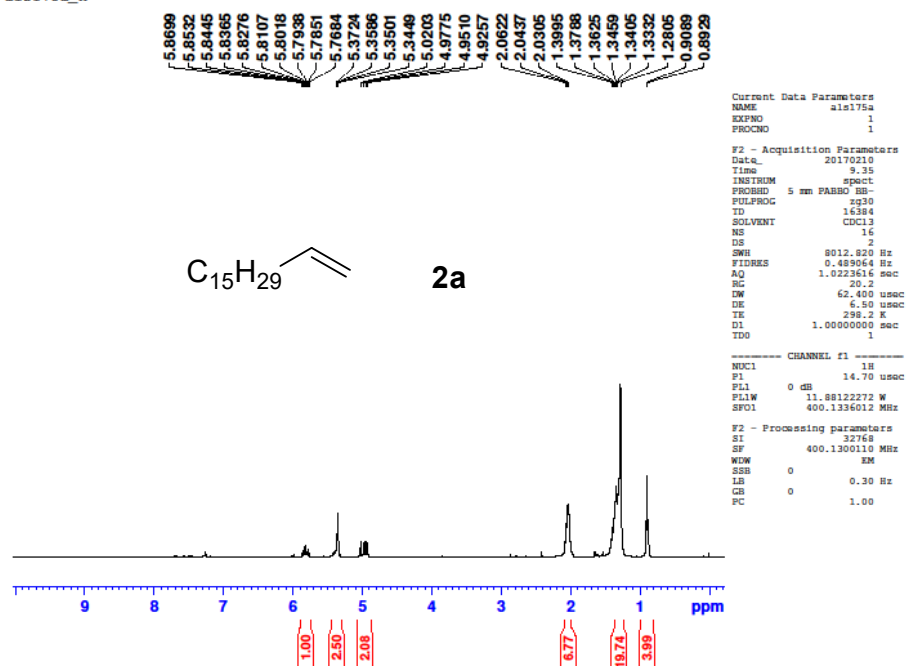

als175a\_C13

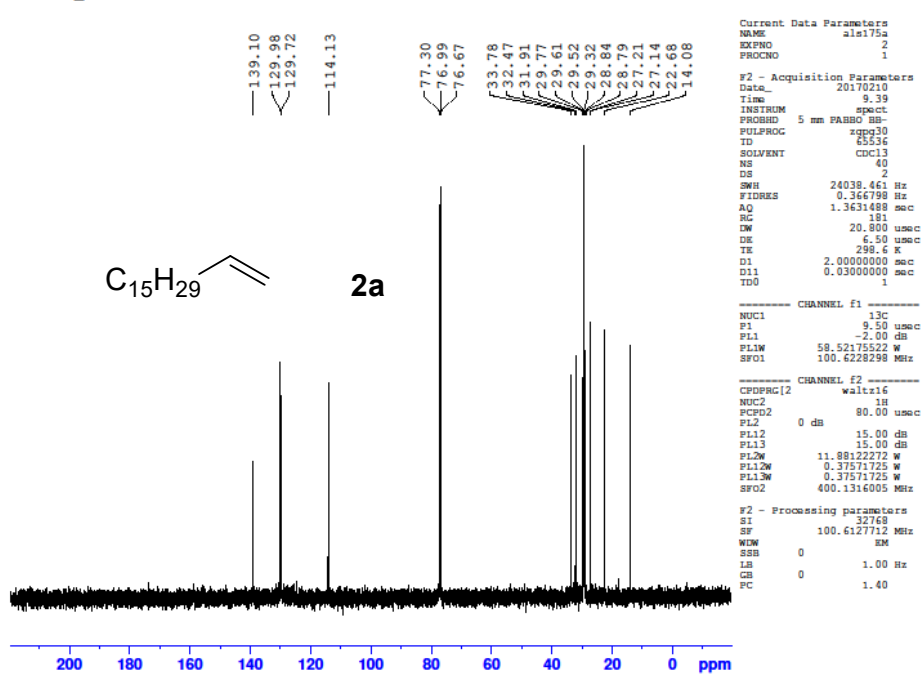

File :D:\MassHunter\GCMS\1\data\alston\als175a.D  
Operator : duan  
Acquired : 07 Feb 2017 14:50 using AcqMethod M1.M  
Instrument : 5977  
Sample Name: als175a  
Misc Info :  
Vial Number: 146

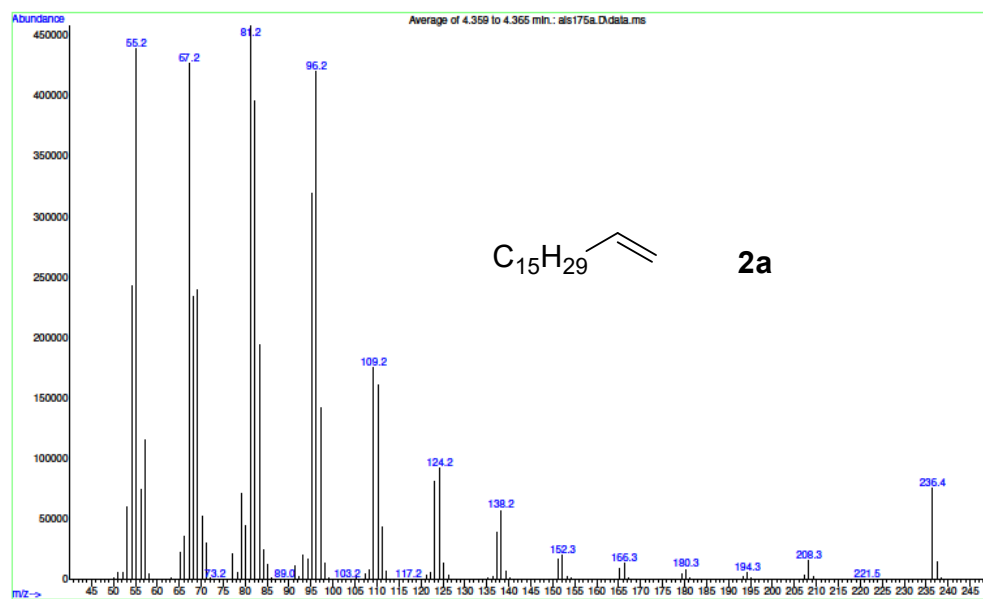

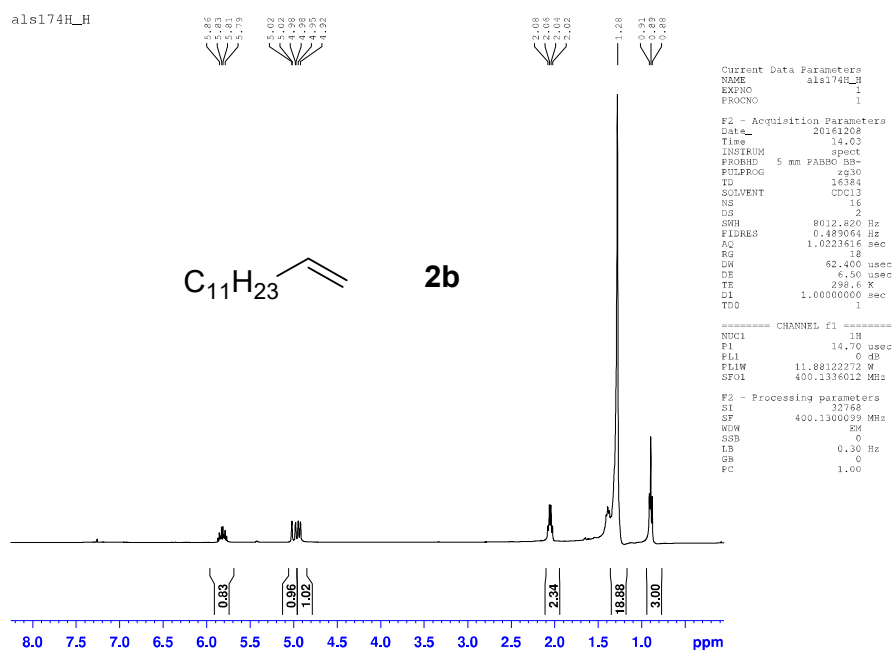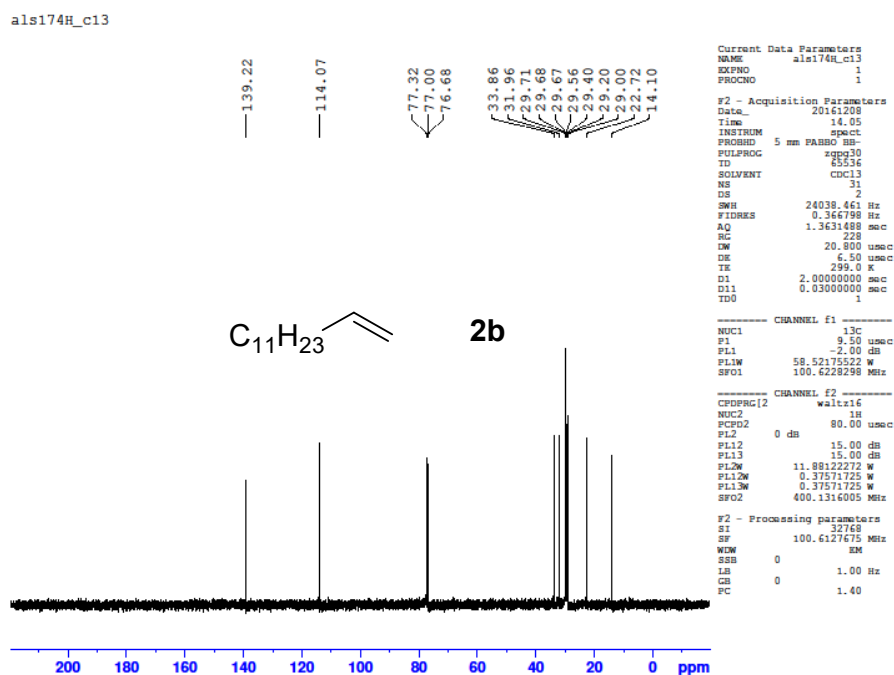

File :D:\MassHunter\GCMS\1\data\alston\als174h.D  
Operator : duan  
Acquired : 02 Dec 2016 11:31 using AcqMethod M1.M  
Instrument : 5977  
Sample Name: als174h  
Misc Info :  
Vial Number: 8

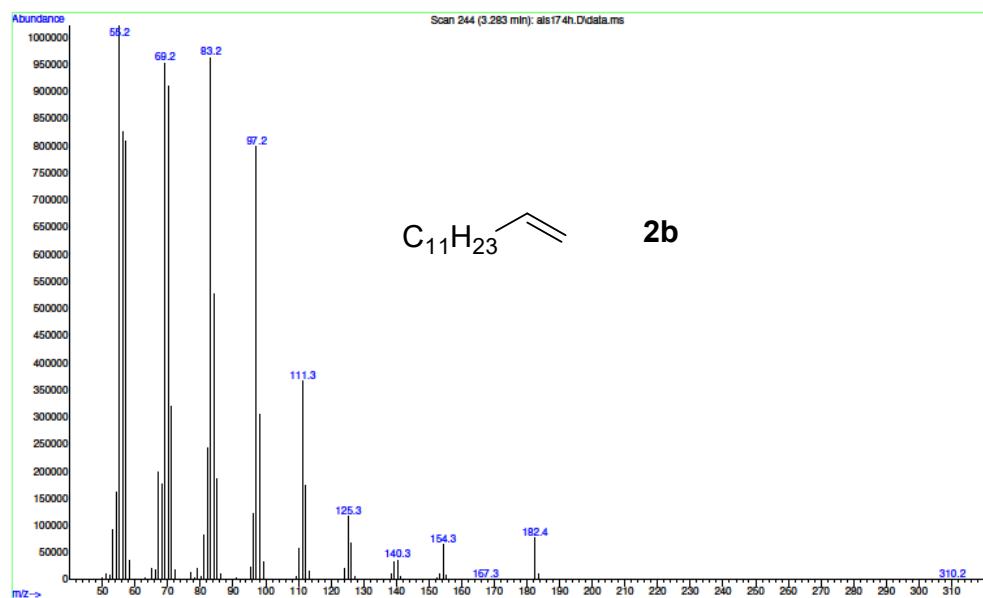

als174e\_H

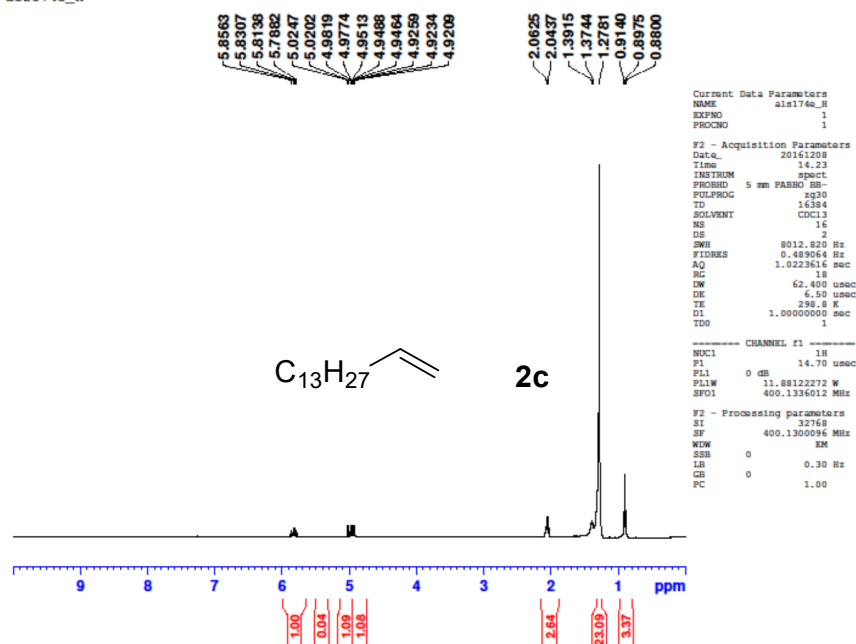

als174e\_c13

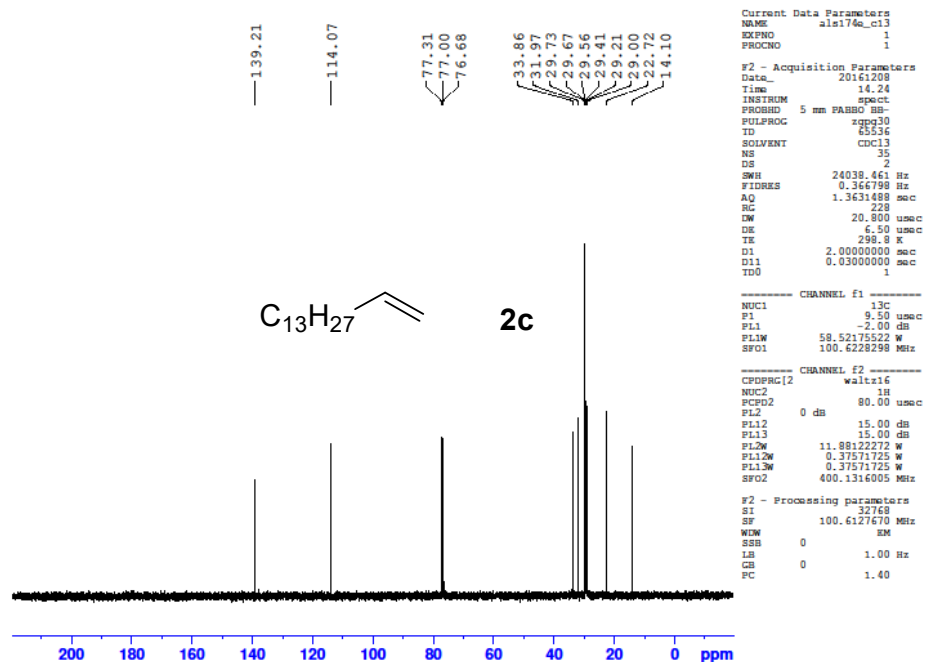

File :D:\MassHunter\GCMS\1\data\alston\als174e.D  
Operator : duan  
Acquired : 02 Dec 2016 11:06 using AcqMethod M1.M  
Instrument : 5977  
Sample Name: als174e  
Misc Info :  
Vial Number: 6

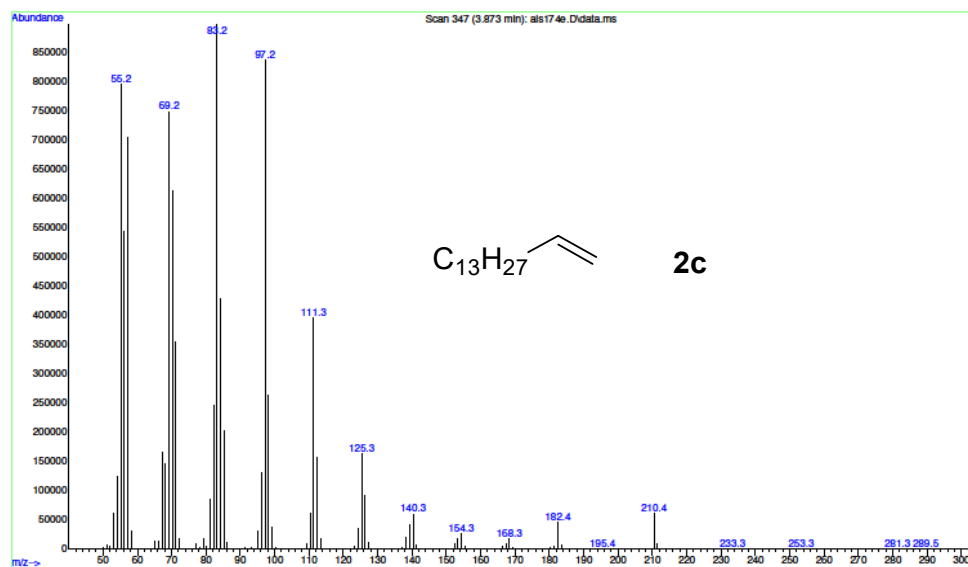

als174f\_H

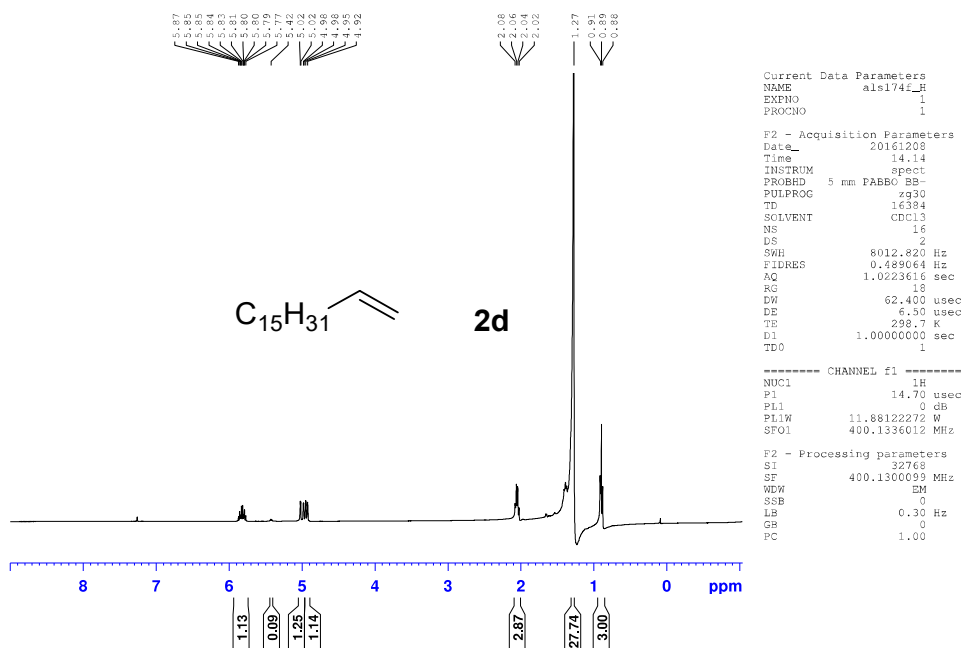

als174f\_c13

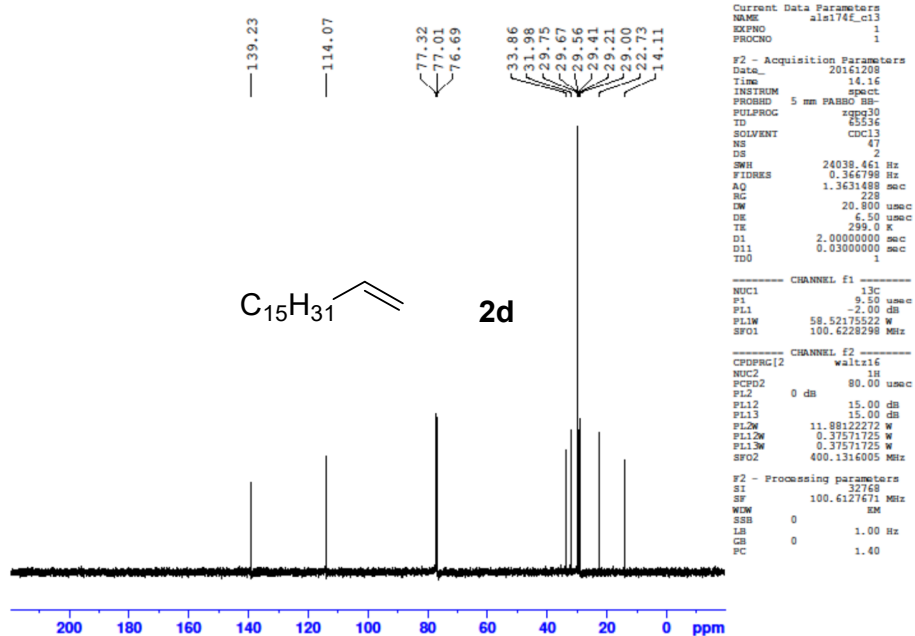



File :D:\MassHunter\GCMS\1\data\alston\als174f.D  
Operator : duan  
Acquired : 02 Dec 2016 11:19 using AcqMethod M1.M  
Instrument : 5977  
Sample Name: als174f  
Misc Info :  
Vial Number: 7

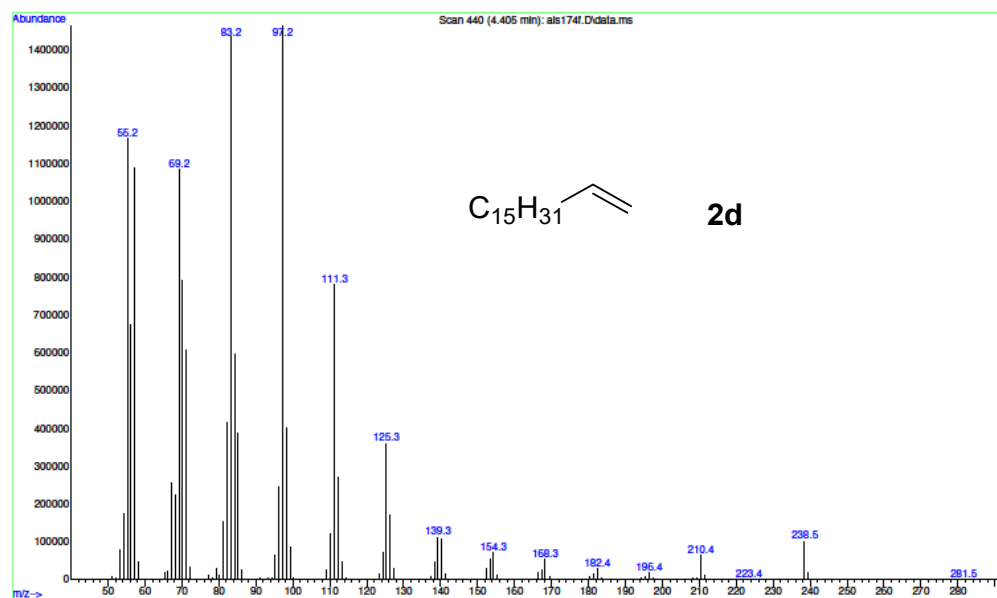

als184e\_H

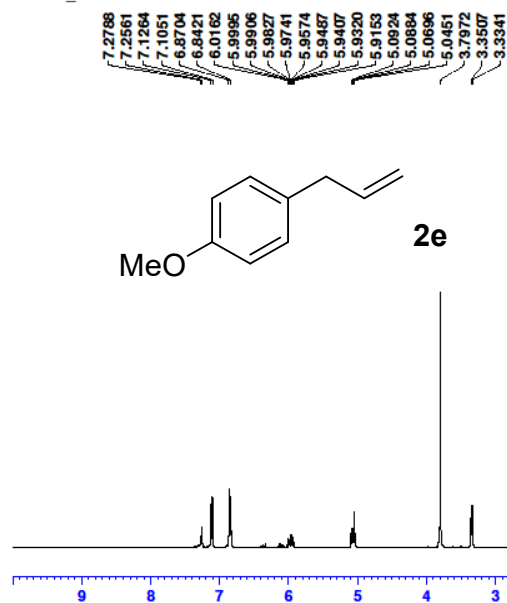

Current Data Parameters  
 NAME als184e  
 EXPNO 1  
 PROCNO 1

F2 - Acquisition Parameters  
 Date\_ 20170427  
 Time 9.54  
 INSTRUM spect  
 PROBHD 5 mm PABBO BB-  
 PULPROG zg30  
 ID 16384  
 SOLVENT CDCl3  
 NS 16  
 DS 2  
 SWH 8012.820 Hz  
 FIDRES 0.489064 Hz  
 AQ 1.0223616 sec  
 RG 80.6  
 DW 62.400 usec  
 DE 6.50 usec  
 TE 297.9 K  
 D1 1.00000000 sec  
 TD 1

----- CHANNEL f1 -----  
 NUC1 1H  
 P1 14.70 usec  
 PL1 0 dB  
 PL1W 11.88122272 W  
 SFO1 400.1336012 MHz

F2 - Processing parameters  
 SI 32768  
 SF 400.1300113 MHz  
 WDW EM  
 SSB 0  
 LB 0.30 Hz  
 GB 0  
 PC 1.00

als184e\_13C

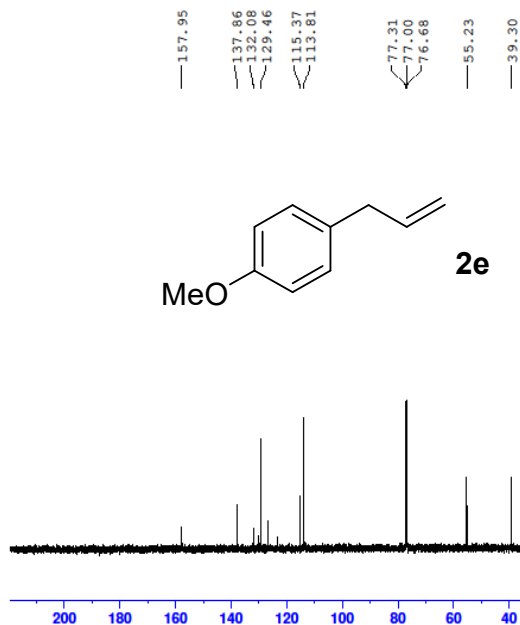

Current Data Parameters  
 NAME als184e  
 EXPNO 2  
 PROCNO 1

F2 - Acquisition Parameters  
 Date\_ 20170427  
 Time 10.00  
 INSTRUM spect  
 PROBHD 5 mm PABBO BB-  
 PULPROG zgpg30  
 ID 65536  
 SOLVENT CDCl3  
 NS 29  
 DS 2  
 SWH 24038.461 Hz  
 FIDRES 0.346798 Hz  
 AQ 1.3631488 sec  
 RG 203  
 DW 20.800 usec  
 DE 6.50 usec  
 TE 298.7 K  
 D1 2.00000000 sec  
 D11 0.03000000 sec  
 TD 1

----- CHANNEL f1 -----  
 NUC1 13C  
 P1 9.50 usec  
 PL1 -2.00 dB  
 PL1W 58.52175522 W  
 SFO1 100.6228298 MHz

----- CHANNEL f2 -----  
 CPDPRG2 waltz16  
 NUC2 1H  
 PCPD2 80.00 usec  
 PL2 0 dB  
 PL12 15.00 dB  
 PL13 15.00 dB  
 PL1W 11.88122272 W  
 PL12W 0.37571725 W  
 PL13W 0.37571725 W  
 SFO2 400.1316005 MHz

F2 - Processing parameters  
 SI 32768  
 SF 100.6127736 MHz  
 WDW EM  
 SSB 0  
 LB 1.00 Hz  
 GB 0  
 PC 1.40

File :D:\MassHunter\GCMS\1\data\alston\als184et2.D  
Operator : duan  
Acquired : 26 Apr 2017 15:37 using AcqMethod M1.M  
Instrument : 5977  
Sample Name: als184et2  
Misc Info :  
Vial Number: 2

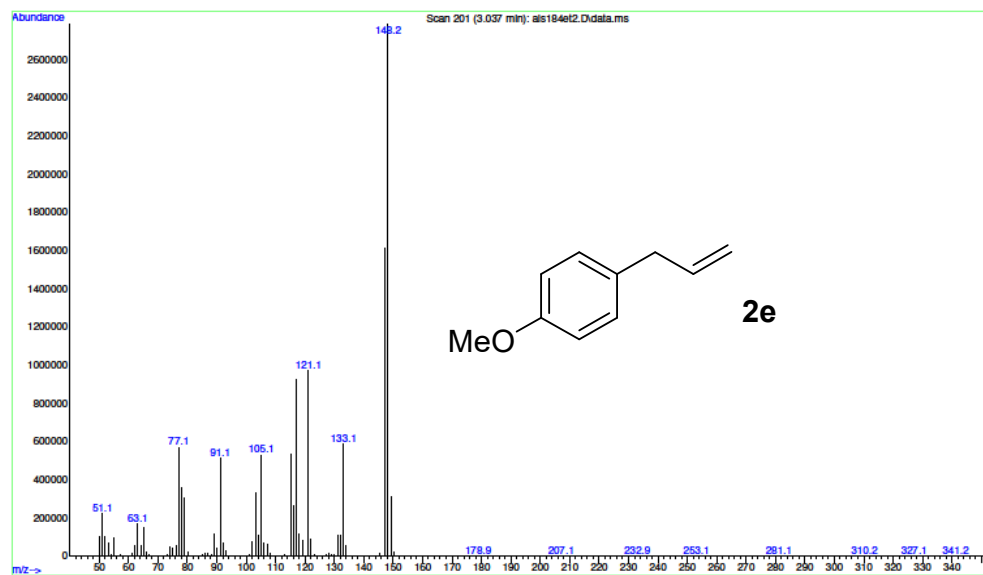

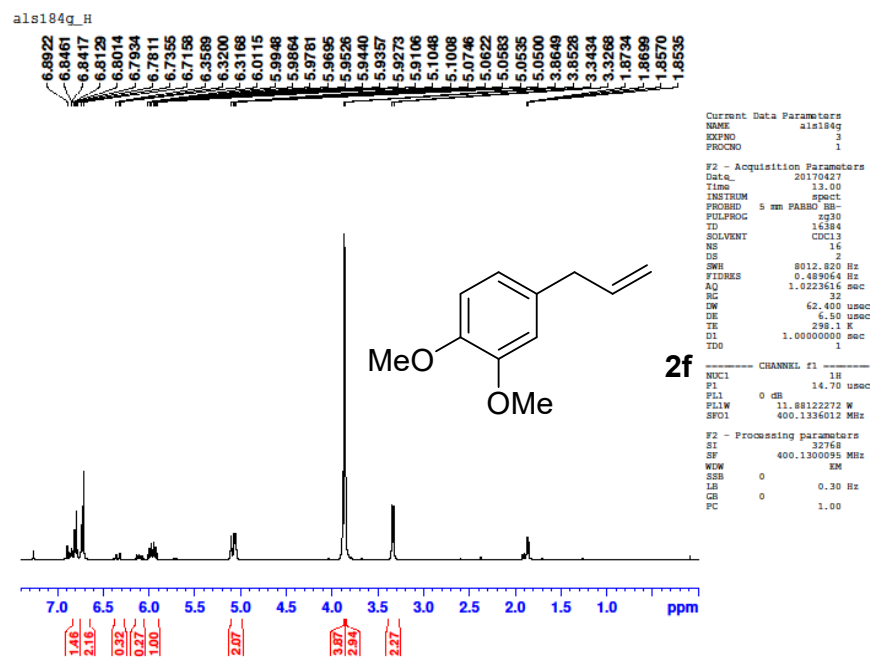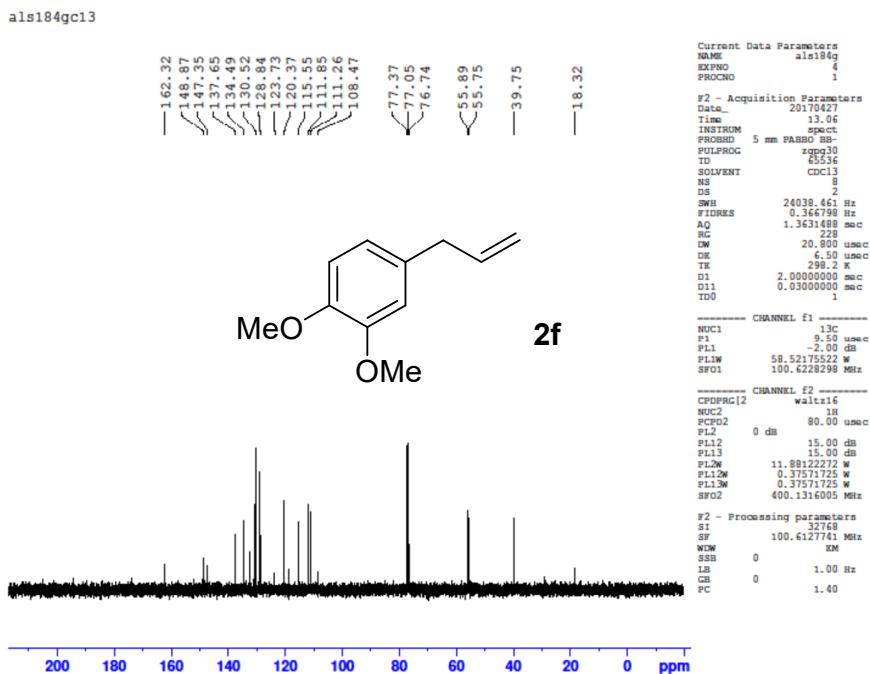

File :D:\MassHunter\GCMS\1\data\alston\als184g.D  
Operator : duan  
Acquired : 26 Apr 2017 12:17 using AcqMethod M1.M  
Instrument : 5977  
Sample Name: als184g  
Misc Info :  
Vial Number: 4

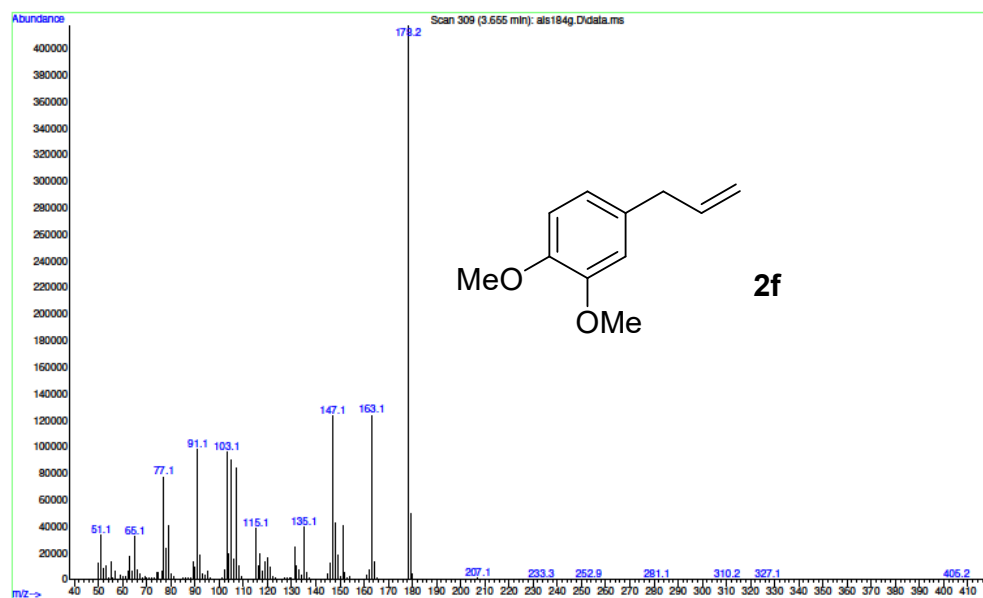

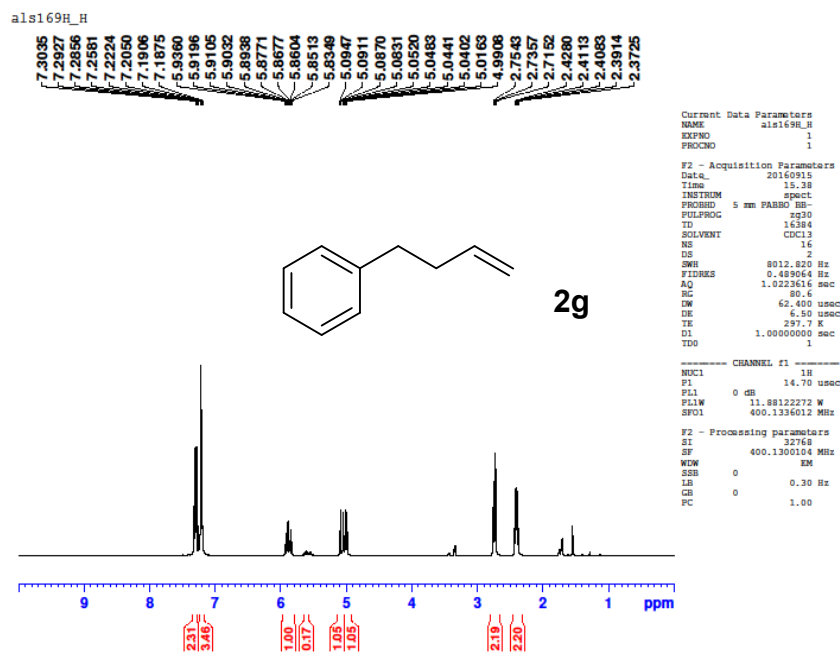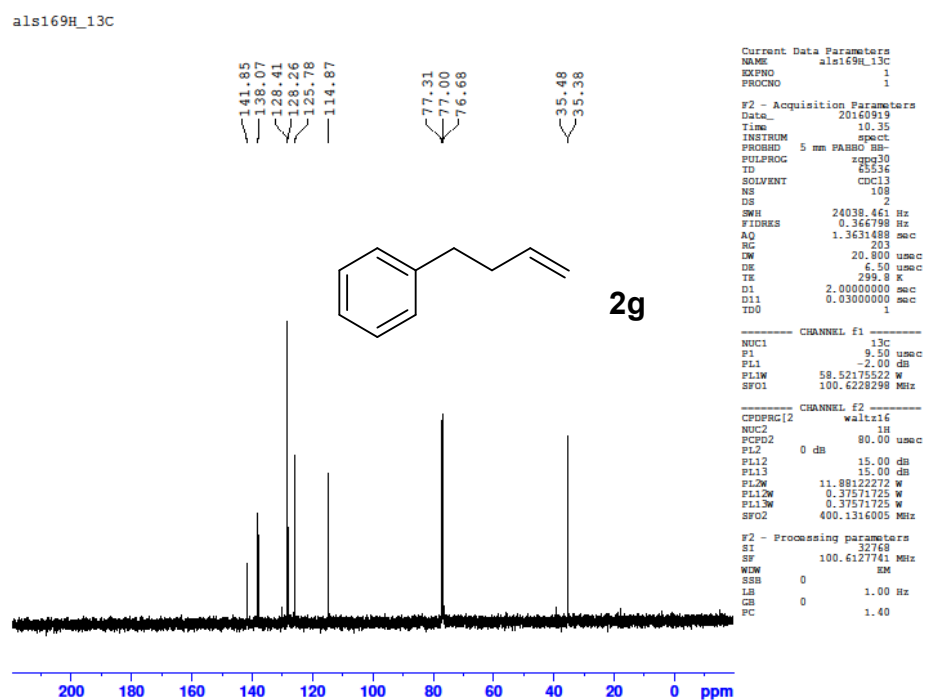

File :D:\MassHunter\GCMS\1\data\alston\als169H\_P.D  
Operator : duan  
Acquired : 14 Sep 2016 15:28 using AcqMethod M1.M  
Instrument : 5977  
Sample Name: als169H\_P  
Misc Info :  
Vial Number: 20

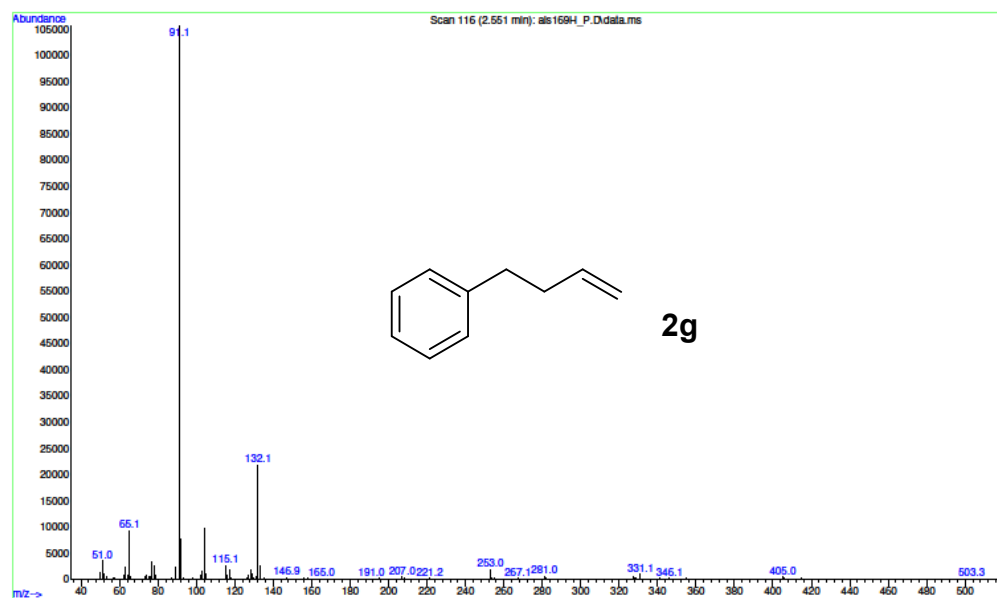

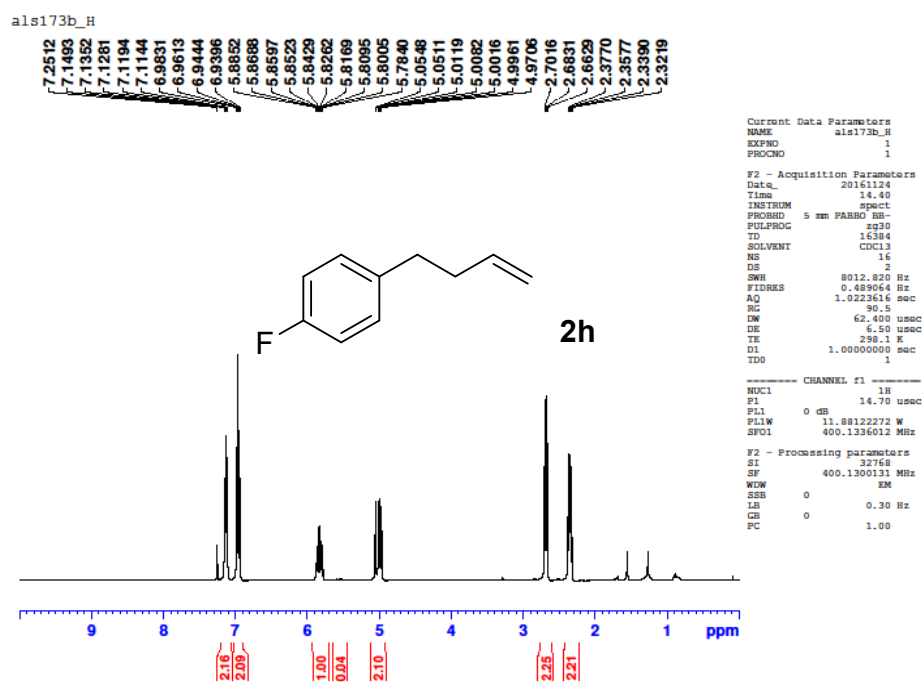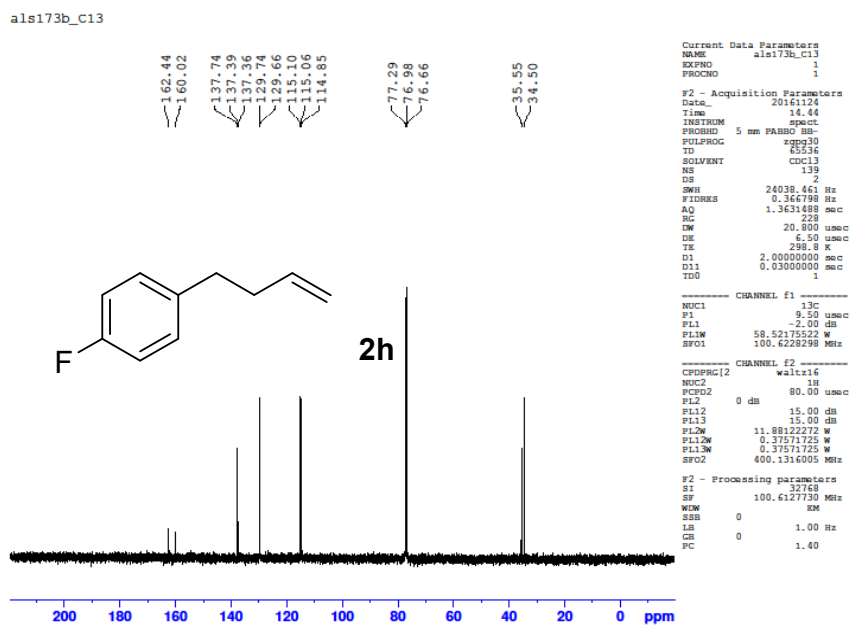



File :D:\MassHunter\GCMS\1\data\alston\ALS1738.D  
Operator : duan  
Acquired : 11 Nov 2016 14:58 using AcqMethod M1.M  
Instrument : 5977  
Sample Name: ALS1738  
Misc Info :  
Vial Number: 2

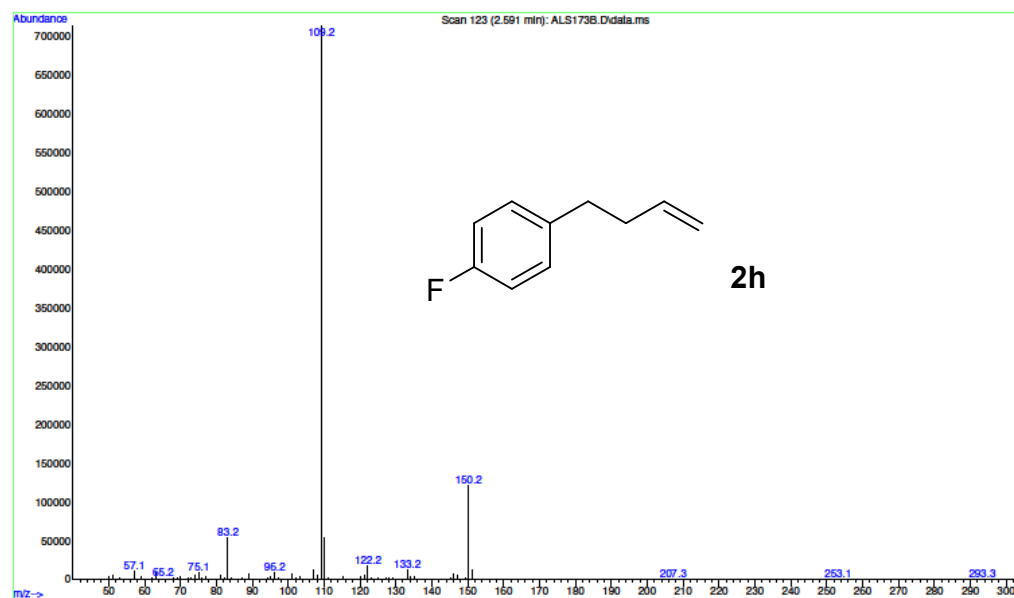

als175e\_H

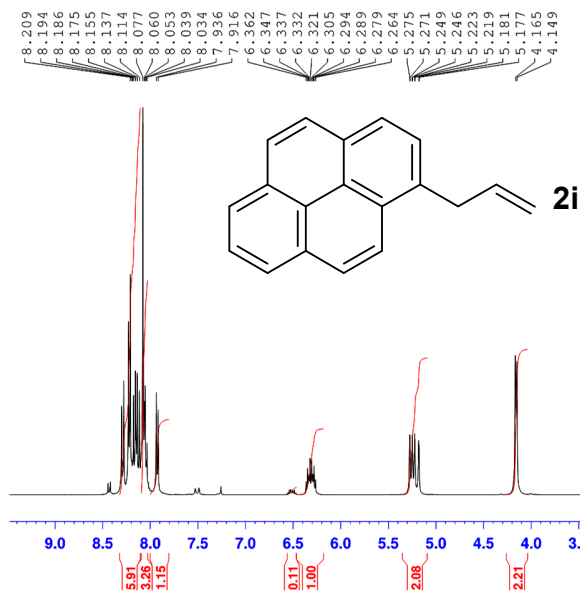

Current Data Parameters  
 NAME als175e  
 EXPNO 1  
 PROCNO 1

F2 - Acquisition Parameters  
 Date\_ 20170210  
 Time 9.22  
 INSTRUM spect  
 PROBHD 5 mm PABBO BB-  
 PULPROG zg30  
 TD 16384  
 SOLVENT CDCl3  
 NS 16  
 DS 2  
 SWH 8012.820 Hz  
 FIDRES 0.489064 Hz  
 AQ 1.0223616 sec  
 RG 22.6  
 DW 62.400 usec  
 DE 6.50 usec  
 TE 297.9 K  
 D1 1.00000000 sec  
 TDO 1

===== CHANNEL f1 =====  
 NUC1 1H  
 P1 14.70 usec  
 PL1 0 dB  
 PL1W 11.88122272 W  
 SFO1 400.1336012 MHz

F2 - Processing parameters  
 S1 32768  
 SF 400.1300103 MHz  
 WDW EM  
 SSB 0  
 LB 0.30 Hz  
 GB 0  
 PC 1.00

als175e\_C13

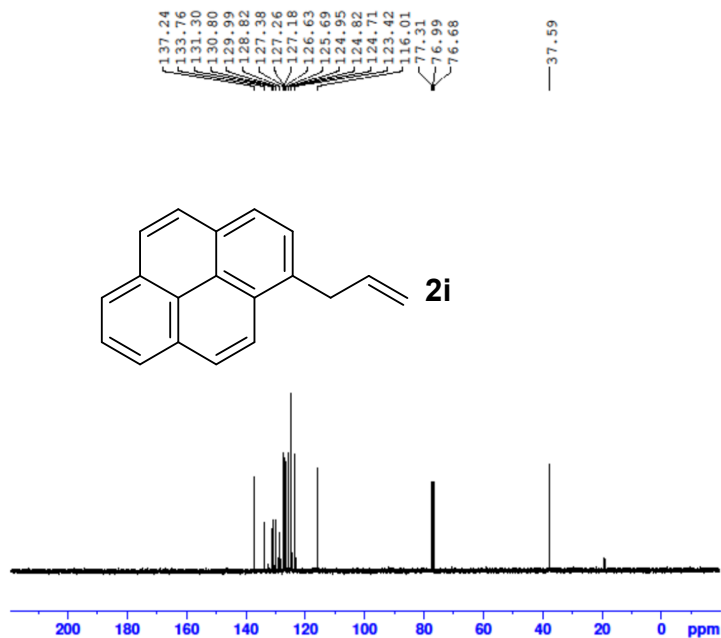

Current Data Parameters  
 NAME als175e  
 EXPNO 2  
 PROCNO 1

F2 - Acquisition Parameters  
 Date\_ 20170210  
 Time 9.28  
 INSTRUM spect  
 PROBHD 5 mm PABBO BB-  
 PULPROG zgpg30  
 TD 65536  
 SOLVENT CDCl3  
 NS 43  
 DS 2  
 SWH 24038.461 Hz  
 FIDRES 0.366798 Hz  
 AQ 1.3631488 sec  
 RG 144  
 DW 20.800 usec  
 DE 6.50 usec  
 TE 298.2 K  
 D1 2.00000000 sec  
 D11 0.03000000 sec  
 TDO 1

===== CHANNEL f1 =====  
 NUC1 13C  
 P1 9.50 usec  
 PL1 -2.00 dB  
 PL1W 58.52175522 W  
 SFO1 100.6228298 MHz

===== CHANNEL f2 =====  
 CPDPRG2 waltz16  
 NUC2 1H  
 PCPD2 80.00 usec  
 PL2 0 dB  
 PL12 15.00 dB  
 PL13 15.00 dB  
 PL2W 11.88122272 W  
 PL12W 0.37571725 W  
 PL13W 0.37571725 W  
 SFO2 400.1316005 MHz

F2 - Processing parameters  
 S1 32768  
 SF 100.6127909 MHz  
 WDW EM  
 SSB 0  
 LB 1.00 Hz  
 GB 0  
 PC 1.40

File :D:\MassHunter\GCMS\1\data\alston\als175e.D  
Operator : duan  
Acquired : 07 Feb 2017 15:39 using AcqMethod M1.M  
Instrument : 5977  
Sample Name: als175e  
Misc Info :  
Vial Number: 150

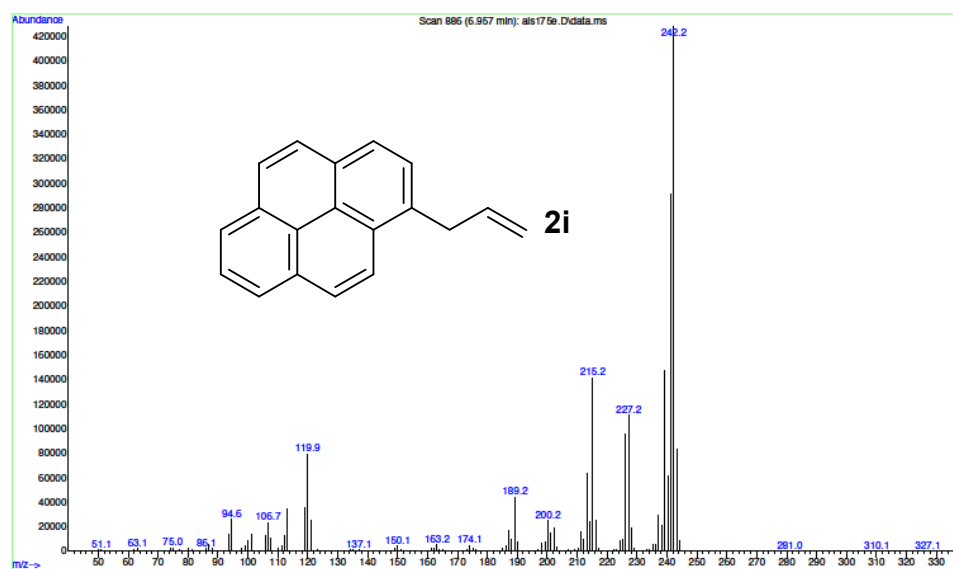

## 8. X-ray crystalline structure for Pd-complexes

Figure S6: Crystalline structure of  $[\text{PdCl}_2(\text{C}_{28}\text{H}_{21}\text{P})]_2$ , Pd-CP-1 complex

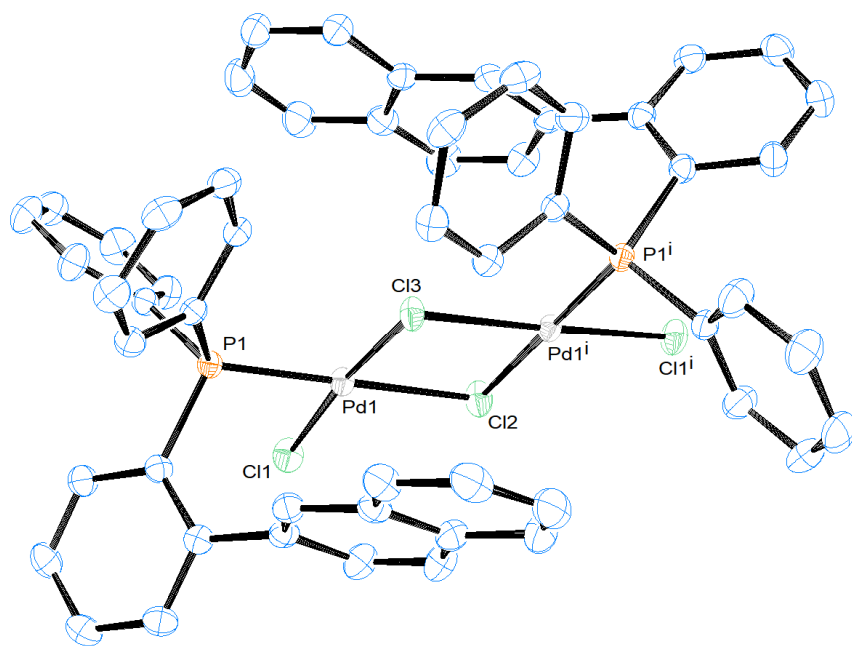

Table S2. Crystal data and structure refinement for [PdCl<sub>2</sub>(C<sub>28</sub>H<sub>21</sub>P)]<sub>2</sub>, Pd-CP-1.

|                                 |                                                                                                                      |
|---------------------------------|----------------------------------------------------------------------------------------------------------------------|
| Identification code             | ALS1702                                                                                                              |
| Empirical formula               | C <sub>58</sub> H <sub>46</sub> Cl <sub>8</sub> P <sub>2</sub> Pd <sub>2</sub>                                       |
| Formula weight                  | 1301.29                                                                                                              |
| Temperature                     | 298(2) K                                                                                                             |
| Wavelength                      | 0.71073 Å                                                                                                            |
| Crystal system, space group     | Monoclinic, C 2/c                                                                                                    |
| Unit cell dimensions            | a = 26.9421(86) Å alpha = 90 deg.<br>b = 11.1527(33) Å beta = 114.7781(86) deg.<br>c = 19.7203(59) Å gamma = 90 deg. |
| Volume                          | 5380(3) Å <sup>3</sup>                                                                                               |
| Z, Calculated density           | 4, 1.607 Mg/m <sup>3</sup>                                                                                           |
| Absorption coefficient          | 1.164 mm <sup>-1</sup>                                                                                               |
| F(000)                          | 2608                                                                                                                 |
| Crystal size                    | 0.16 x 0.10 x 0.08 mm                                                                                                |
| Theta range for data collection | 2.76 to 27.51 deg.                                                                                                   |
| Limiting indices                | -34 ≤ h ≤ 34, -14 ≤ k ≤ 14, -25 ≤ l ≤ 25                                                                             |
| Reflections collected / unique  | 60625 / 6168 [R(int) = 0.0426]                                                                                       |
| Completeness to theta = 27.51   | 99.5 %                                                                                                               |
| Absorption correction           | Semi-empirical from equivalents                                                                                      |
| Max. and min. transmission      | 0.9126 and 0.8356                                                                                                    |
| Refinement method               | Full-matrix least-squares on F <sup>2</sup>                                                                          |
| Data / restraints / parameters  | 6168 / 0 / 317                                                                                                       |

Goodness-of-fit on  $F^2$  1.029

Final R indices [ $I > 2\sigma(I)$ ]  $R_1 = 0.0342$ ,  $wR_2 = 0.0774$

R indices (all data)  $R_1 = 0.0515$ ,  $wR_2 = 0.0850$

Largest diff. peak and hole 0.675 and -0.910 e. $\text{\AA}^{-3}$

Table S3. Bond lengths [Å] and angles [deg] for [PdCl<sub>2</sub>(C<sub>28</sub>H<sub>21</sub>P)]<sub>2</sub>, Pd-CP-1.

|               |           |
|---------------|-----------|
| Pd(1)-P(1)    | 2.2563(8) |
| Pd(1)-Cl(1)   | 2.2937(9) |
| Pd(1)-Cl(3)   | 2.3181(8) |
| Pd(1)-Cl(2)   | 2.4293(9) |
| Cl(2)-Pd(1)#1 | 2.4293(9) |
| Cl(3)-Pd(1)#1 | 2.3181(8) |
| P(1)-C(1)     | 1.820(3)  |
| P(1)-C(13)    | 1.824(3)  |
| P(1)-C(7)     | 1.830(3)  |
| C(1)-C(6)     | 1.389(4)  |
| C(1)-C(2)     | 1.392(4)  |
| C(2)-C(3)     | 1.378(4)  |
| C(2)-H(2A)    | 0.9300    |
| C(3)-C(4)     | 1.375(5)  |
| C(3)-H(3A)    | 0.9300    |
| C(4)-C(5)     | 1.374(5)  |
| C(4)-H(4A)    | 0.9300    |
| C(5)-C(6)     | 1.381(4)  |
| C(5)-H(5A)    | 0.9300    |
| C(6)-H(6A)    | 0.9300    |
| C(7)-C(8)     | 1.383(4)  |
| C(7)-C(12)    | 1.386(4)  |
| C(8)-C(9)     | 1.395(5)  |
| C(8)-H(8A)    | 0.9300    |
| C(9)-C(10)    | 1.364(6)  |
| C(9)-H(9A)    | 0.9300    |
| C(10)-C(11)   | 1.363(5)  |
| C(10)-H(10A)  | 0.9300    |
| C(11)-C(12)   | 1.387(5)  |
| C(11)-H(11A)  | 0.9300    |
| C(12)-H(12A)  | 0.9300    |

|              |          |
|--------------|----------|
| C(13)-C(14)  | 1.396(4) |
| C(13)-C(18)  | 1.399(4) |
| C(14)-C(15)  | 1.384(4) |
| C(14)-H(14A) | 0.9300   |
| C(15)-C(16)  | 1.366(5) |
| C(15)-H(15A) | 0.9300   |
| C(16)-C(17)  | 1.385(4) |
| C(16)-H(16A) | 0.9300   |
| C(17)-C(18)  | 1.390(4) |
| C(17)-H(17A) | 0.9300   |
| C(18)-C(19)  | 1.504(4) |
| C(19)-C(20)  | 1.364(4) |
| C(19)-C(28)  | 1.414(4) |
| C(20)-C(21)  | 1.431(4) |
| C(20)-H(20A) | 0.9300   |
| C(21)-C(26)  | 1.407(4) |
| C(21)-C(22)  | 1.410(4) |
| C(22)-C(23)  | 1.370(5) |
| C(22)-H(22A) | 0.9300   |
| C(23)-C(24)  | 1.398(6) |
| C(23)-H(23A) | 0.9300   |
| C(24)-C(25)  | 1.342(6) |
| C(24)-H(24A) | 0.9300   |
| C(25)-C(26)  | 1.439(5) |
| C(25)-H(25A) | 0.9300   |
| C(26)-C(27)  | 1.396(5) |
| C(27)-C(28)  | 1.372(5) |
| C(27)-H(27A) | 0.9300   |
| C(28)-H(28A) | 0.9300   |
| C(29)-Cl(4)  | 1.698(5) |
| C(29)-Cl(5)  | 1.712(5) |
| C(29)-H(29A) | 0.9700   |
| C(29)-H(29B) | 0.9700   |

|                     |            |
|---------------------|------------|
| P(1)-Pd(1)-Cl(1)    | 87.83(3)   |
| P(1)-Pd(1)-Cl(3)    | 96.18(3)   |
| Cl(1)-Pd(1)-Cl(3)   | 173.89(3)  |
| P(1)-Pd(1)-Cl(2)    | 179.65(2)  |
| Cl(1)-Pd(1)-Cl(2)   | 92.09(4)   |
| Cl(3)-Pd(1)-Cl(2)   | 83.93(3)   |
| Pd(1)#1-Cl(2)-Pd(1) | 93.09(4)   |
| Pd(1)-Cl(3)-Pd(1)#1 | 99.06(4)   |
| C(1)-P(1)-C(13)     | 106.77(13) |
| C(1)-P(1)-C(7)      | 101.29(13) |

|                    |            |
|--------------------|------------|
| C(13)-P(1)-C(7)    | 106.90(13) |
| C(1)-P(1)-Pd(1)    | 117.12(9)  |
| C(13)-P(1)-Pd(1)   | 108.83(9)  |
| C(7)-P(1)-Pd(1)    | 115.14(10) |
| C(6)-C(1)-C(2)     | 118.7(3)   |
| C(6)-C(1)-P(1)     | 121.5(2)   |
| C(2)-C(1)-P(1)     | 119.6(2)   |
| C(3)-C(2)-C(1)     | 120.2(3)   |
| C(3)-C(2)-H(2A)    | 119.9      |
| C(1)-C(2)-H(2A)    | 119.9      |
| C(4)-C(3)-C(2)     | 120.5(3)   |
| C(4)-C(3)-H(3A)    | 119.7      |
| C(2)-C(3)-H(3A)    | 119.7      |
| C(5)-C(4)-C(3)     | 119.7(3)   |
| C(5)-C(4)-H(4A)    | 120.1      |
| C(3)-C(4)-H(4A)    | 120.1      |
| C(4)-C(5)-C(6)     | 120.3(3)   |
| C(4)-C(5)-H(5A)    | 119.9      |
| C(6)-C(5)-H(5A)    | 119.9      |
| C(5)-C(6)-C(1)     | 120.4(3)   |
| C(5)-C(6)-H(6A)    | 119.8      |
| C(1)-C(6)-H(6A)    | 119.8      |
| C(8)-C(7)-C(12)    | 118.6(3)   |
| C(8)-C(7)-P(1)     | 122.0(2)   |
| C(12)-C(7)-P(1)    | 119.3(2)   |
| C(7)-C(8)-C(9)     | 119.7(3)   |
| C(7)-C(8)-H(8A)    | 120.2      |
| C(9)-C(8)-H(8A)    | 120.2      |
| C(10)-C(9)-C(8)    | 120.8(4)   |
| C(10)-C(9)-H(9A)   | 119.6      |
| C(8)-C(9)-H(9A)    | 119.6      |
| C(11)-C(10)-C(9)   | 120.2(3)   |
| C(11)-C(10)-H(10A) | 119.9      |
| C(9)-C(10)-H(10A)  | 119.9      |
| C(10)-C(11)-C(12)  | 119.8(3)   |
| C(10)-C(11)-H(11A) | 120.1      |
| C(12)-C(11)-H(11A) | 120.1      |
| C(7)-C(12)-C(11)   | 120.9(3)   |
| C(7)-C(12)-H(12A)  | 119.5      |
| C(11)-C(12)-H(12A) | 119.5      |
| C(14)-C(13)-C(18)  | 119.4(3)   |
| C(14)-C(13)-P(1)   | 119.5(2)   |
| C(18)-C(13)-P(1)   | 121.0(2)   |
| C(15)-C(14)-C(13)  | 120.8(3)   |



|                    |          |
|--------------------|----------|
| C(15)-C(14)-H(14A) | 119.6    |
| C(13)-C(14)-H(14A) | 119.6    |
| C(16)-C(15)-C(14)  | 119.9(3) |
| C(16)-C(15)-H(15A) | 120.1    |
| C(14)-C(15)-H(15A) | 120.1    |
| C(15)-C(16)-C(17)  | 120.1(3) |
| C(15)-C(16)-H(16A) | 119.9    |
| C(17)-C(16)-H(16A) | 119.9    |
| C(16)-C(17)-C(18)  | 121.2(3) |
| C(16)-C(17)-H(17A) | 119.4    |
| C(18)-C(17)-H(17A) | 119.4    |
| C(17)-C(18)-C(13)  | 118.7(3) |
| C(17)-C(18)-C(19)  | 117.7(3) |
| C(13)-C(18)-C(19)  | 123.6(2) |
| C(20)-C(19)-C(28)  | 119.0(3) |
| C(20)-C(19)-C(18)  | 121.1(3) |
| C(28)-C(19)-C(18)  | 119.7(3) |
| C(19)-C(20)-C(21)  | 121.2(3) |
| C(19)-C(20)-H(20A) | 119.4    |
| C(21)-C(20)-H(20A) | 119.4    |
| C(26)-C(21)-C(22)  | 120.1(3) |
| C(26)-C(21)-C(20)  | 118.7(3) |
| C(22)-C(21)-C(20)  | 121.2(3) |
| C(23)-C(22)-C(21)  | 120.0(3) |
| C(23)-C(22)-H(22A) | 120.0    |
| C(21)-C(22)-H(22A) | 120.0    |
| C(22)-C(23)-C(24)  | 120.3(4) |
| C(22)-C(23)-H(23A) | 119.8    |
| C(24)-C(23)-H(23A) | 119.8    |
| C(25)-C(24)-C(23)  | 121.1(3) |
| C(25)-C(24)-H(24A) | 119.5    |
| C(23)-C(24)-H(24A) | 119.5    |
| C(24)-C(25)-C(26)  | 120.8(4) |
| C(24)-C(25)-H(25A) | 119.6    |
| C(26)-C(25)-H(25A) | 119.6    |
| C(27)-C(26)-C(21)  | 119.4(3) |
| C(27)-C(26)-C(25)  | 123.0(3) |
| C(21)-C(26)-C(25)  | 117.6(3) |
| C(28)-C(27)-C(26)  | 120.8(3) |
| C(28)-C(27)-H(27A) | 119.6    |
| C(26)-C(27)-H(27A) | 119.6    |
| C(27)-C(28)-C(19)  | 120.9(3) |
| C(27)-C(28)-H(28A) | 119.6    |
| C(19)-C(28)-H(28A) | 119.6    |

|                     |          |
|---------------------|----------|
| Cl(4)-C(29)-Cl(5)   | 115.8(3) |
| Cl(4)-C(29)-H(29A)  | 108.3    |
| Cl(5)-C(29)-H(29A)  | 108.3    |
| Cl(4)-C(29)-H(29B)  | 108.3    |
| Cl(5)-C(29)-H(29B)  | 108.3    |
| H(29A)-C(29)-H(29B) | 107.4    |

---

Symmetry transformations used to generate equivalent atoms:

#1 -x+1,y,-z+1/2

Table S4. Torsion angles [deg] for ALS1702.

|                           |            |
|---------------------------|------------|
| P(1)-Pd(1)-Cl(2)-Pd(1)#1  | 107(5)     |
| Cl(1)-Pd(1)-Cl(2)-Pd(1)#1 | -175.36(2) |
| Cl(3)-Pd(1)-Cl(2)-Pd(1)#1 | 0.0        |
| P(1)-Pd(1)-Cl(3)-Pd(1)#1  | -179.66(2) |
| Cl(1)-Pd(1)-Cl(3)-Pd(1)#1 | 49.5(3)    |
| Cl(2)-Pd(1)-Cl(3)-Pd(1)#1 | 0.0        |
| Cl(1)-Pd(1)-P(1)-C(1)     | 173.04(10) |
| Cl(3)-Pd(1)-P(1)-C(1)     | -2.34(10)  |
| Cl(2)-Pd(1)-P(1)-C(1)     | -109(5)    |
| Cl(1)-Pd(1)-P(1)-C(13)    | 51.90(10)  |
| Cl(3)-Pd(1)-P(1)-C(13)    | -123.48(9) |
| Cl(2)-Pd(1)-P(1)-C(13)    | 130(5)     |
| Cl(1)-Pd(1)-P(1)-C(7)     | -68.06(11) |
| Cl(3)-Pd(1)-P(1)-C(7)     | 116.56(10) |
| Cl(2)-Pd(1)-P(1)-C(7)     | 10(5)      |
| C(13)-P(1)-C(1)-C(6)      | -14.4(3)   |
| C(7)-P(1)-C(1)-C(6)       | 97.3(2)    |
| Pd(1)-P(1)-C(1)-C(6)      | -136.6(2)  |
| C(13)-P(1)-C(1)-C(2)      | 171.2(2)   |
| C(7)-P(1)-C(1)-C(2)       | -77.1(2)   |
| Pd(1)-P(1)-C(1)-C(2)      | 49.0(2)    |
| C(6)-C(1)-C(2)-C(3)       | 4.0(4)     |
| P(1)-C(1)-C(2)-C(3)       | 178.5(2)   |
| C(1)-C(2)-C(3)-C(4)       | -2.0(4)    |
| C(2)-C(3)-C(4)-C(5)       | -2.0(5)    |
| C(3)-C(4)-C(5)-C(6)       | 3.9(5)     |
| C(4)-C(5)-C(6)-C(1)       | -1.9(5)    |
| C(2)-C(1)-C(6)-C(5)       | -2.1(4)    |
| P(1)-C(1)-C(6)-C(5)       | -176.5(2)  |
| C(1)-P(1)-C(7)-C(8)       | 149.4(3)   |
| C(13)-P(1)-C(7)-C(8)      | -99.0(3)   |
| Pd(1)-P(1)-C(7)-C(8)      | 22.0(3)    |
| C(1)-P(1)-C(7)-C(12)      | -30.1(3)   |
| C(13)-P(1)-C(7)-C(12)     | 81.5(3)    |
| Pd(1)-P(1)-C(7)-C(12)     | -157.4(2)  |
| C(12)-C(7)-C(8)-C(9)      | -0.1(5)    |
| P(1)-C(7)-C(8)-C(9)       | -179.5(3)  |
| C(7)-C(8)-C(9)-C(10)      | 0.3(6)     |
| C(8)-C(9)-C(10)-C(11)     | -0.2(6)    |
| C(9)-C(10)-C(11)-C(12)    | 0.0(6)     |
| C(8)-C(7)-C(12)-C(11)     | -0.2(5)    |
| P(1)-C(7)-C(12)-C(11)     | 179.3(3)   |

|                         |           |
|-------------------------|-----------|
| C(10)-C(11)-C(12)-C(7)  | 0.2(6)    |
| C(1)-P(1)-C(13)-C(14)   | 105.3(2)  |
| C(7)-P(1)-C(13)-C(14)   | -2.5(3)   |
| Pd(1)-P(1)-C(13)-C(14)  | -127.5(2) |
| C(1)-P(1)-C(13)-C(18)   | -79.5(2)  |
| C(7)-P(1)-C(13)-C(18)   | 172.8(2)  |
| Pd(1)-P(1)-C(13)-C(18)  | 47.8(2)   |
| C(18)-C(13)-C(14)-C(15) | -0.9(5)   |
| P(1)-C(13)-C(14)-C(15)  | 174.4(3)  |
| C(13)-C(14)-C(15)-C(16) | -0.2(5)   |
| C(14)-C(15)-C(16)-C(17) | 0.5(5)    |
| C(15)-C(16)-C(17)-C(18) | 0.4(5)    |
| C(16)-C(17)-C(18)-C(13) | -1.5(5)   |
| C(16)-C(17)-C(18)-C(19) | 179.1(3)  |
| C(14)-C(13)-C(18)-C(17) | 1.7(4)    |
| P(1)-C(13)-C(18)-C(17)  | -173.5(2) |
| C(14)-C(13)-C(18)-C(19) | -178.9(3) |
| P(1)-C(13)-C(18)-C(19)  | 5.8(4)    |
| C(17)-C(18)-C(19)-C(20) | -99.0(3)  |
| C(13)-C(18)-C(19)-C(20) | 81.6(4)   |
| C(17)-C(18)-C(19)-C(28) | 75.8(4)   |
| C(13)-C(18)-C(19)-C(28) | -103.6(3) |
| C(28)-C(19)-C(20)-C(21) | 0.4(4)    |
| C(18)-C(19)-C(20)-C(21) | 175.3(3)  |
| C(19)-C(20)-C(21)-C(26) | 1.4(4)    |
| C(19)-C(20)-C(21)-C(22) | -177.6(3) |
| C(26)-C(21)-C(22)-C(23) | 1.5(5)    |
| C(20)-C(21)-C(22)-C(23) | -179.5(3) |
| C(21)-C(22)-C(23)-C(24) | 0.4(5)    |
| C(22)-C(23)-C(24)-C(25) | -1.3(6)   |
| C(23)-C(24)-C(25)-C(26) | 0.2(6)    |
| C(22)-C(21)-C(26)-C(27) | 177.0(3)  |
| C(20)-C(21)-C(26)-C(27) | -2.0(4)   |
| C(22)-C(21)-C(26)-C(25) | -2.5(4)   |
| C(20)-C(21)-C(26)-C(25) | 178.5(3)  |
| C(24)-C(25)-C(26)-C(27) | -177.8(4) |
| C(24)-C(25)-C(26)-C(21) | 1.7(5)    |
| C(21)-C(26)-C(27)-C(28) | 0.8(5)    |
| C(25)-C(26)-C(27)-C(28) | -179.7(3) |
| C(26)-C(27)-C(28)-C(19) | 1.0(6)    |
| C(20)-C(19)-C(28)-C(27) | -1.7(5)   |
| C(18)-C(19)-C(28)-C(27) | -176.6(3) |

Symmetry transformations used to generate equivalent atoms:

#1  $-x+1, y, -z+1/2$

Figure S7: Crystalline structure of  $\text{Pd}(\text{C}_{27}\text{H}_{20}\text{NP})(\text{CH}_3\text{CO}_2)_2$ , Pd-NP-1 complex

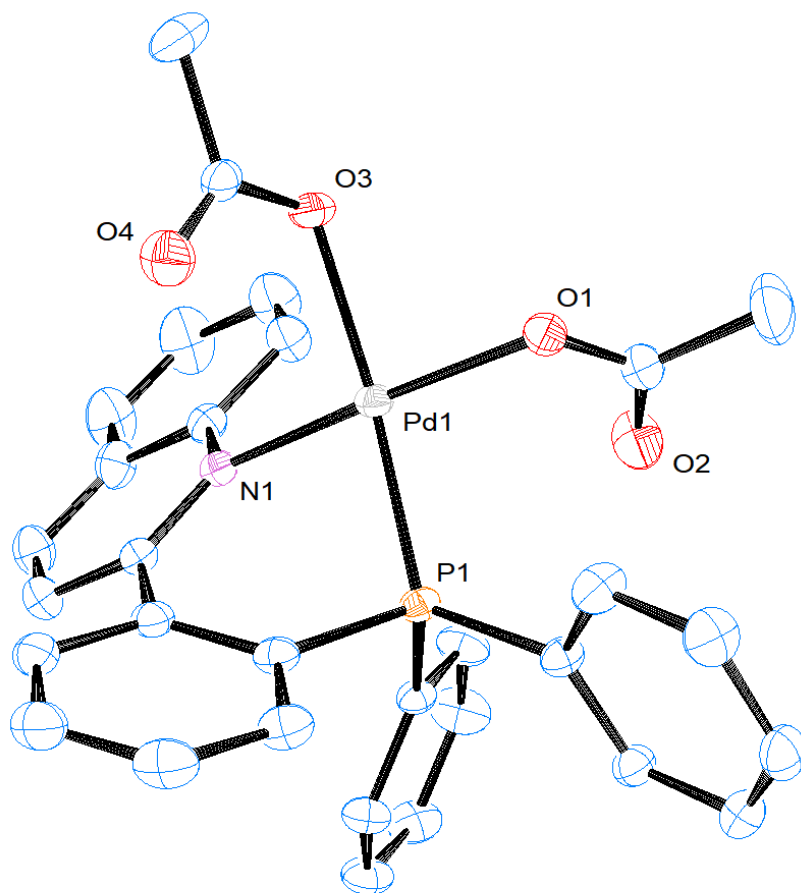

**Table S3. Crystal data and structure refinement for****Pd(C<sub>27</sub>H<sub>20</sub>NP)(CH<sub>3</sub>CO<sub>2</sub>)<sub>2</sub>.****Pd-NP-1 complex.**

|                                   |                                                                                                                        |                 |
|-----------------------------------|------------------------------------------------------------------------------------------------------------------------|-----------------|
| Identification code               | yoy6                                                                                                                   |                 |
| Empirical formula                 | Pd(C <sub>27</sub> H <sub>20</sub> NP)(CH <sub>3</sub> CO <sub>2</sub> ) <sub>2</sub> .CH <sub>2</sub> Cl <sub>2</sub> |                 |
| Formula weight                    | 698.82                                                                                                                 |                 |
| Temperature                       | 297(2) K                                                                                                               |                 |
| Wavelength                        | 0.71073 Å                                                                                                              |                 |
| Crystal system                    | Triclinic                                                                                                              |                 |
| Space group                       | P-1                                                                                                                    |                 |
| Unit cell dimensions              | a = 10.0468(5) Å                                                                                                       | ∠ = 81.570(2)°. |
|                                   | b = 12.3263(7) Å                                                                                                       | ∠ = 75.746(2)°. |
|                                   | c = 13.6449(8) Å                                                                                                       | ∠ = 69.269(2)°. |
| Volume                            | 1528.42(15) Å <sup>3</sup>                                                                                             |                 |
| Z                                 | 2                                                                                                                      |                 |
| Density (calculated)              | 1.518 Mg/m <sup>3</sup>                                                                                                |                 |
| Absorption coefficient            | 0.872 mm <sup>-1</sup>                                                                                                 |                 |
| F(000)                            | 708                                                                                                                    |                 |
| Crystal size                      | 0.12 x 0.06 x 0.04 mm <sup>3</sup>                                                                                     |                 |
| Theta range for data collection   | 2.22 to 30.61°.                                                                                                        |                 |
| Index ranges                      | -14 ≤ h ≤ 14, -17 ≤ k ≤ 17, -19 ≤ l ≤ 19                                                                               |                 |
| Reflections collected             | 135040                                                                                                                 |                 |
| Independent reflections           | 9404 [R(int) = 0.0355]                                                                                                 |                 |
| Completeness to theta = 30.61°    | 99.7 %                                                                                                                 |                 |
| Absorption correction             | None                                                                                                                   |                 |
| Max. and min. transmission        | 0.7461 and 0.7084                                                                                                      |                 |
| Refinement method                 | Full-matrix least-squares on F <sup>2</sup>                                                                            |                 |
| Data / restraints / parameters    | 9404 / 0 / 386                                                                                                         |                 |
| Goodness-of-fit on F <sup>2</sup> | 1.004                                                                                                                  |                 |
| Final R indices [I > 2σ(I)]       | R1 = 0.0377, wR2 = 0.1031                                                                                              |                 |
| R indices (all data)              | R1 = 0.0498, wR2 = 0.1175                                                                                              |                 |
| Largest diff. peak and hole       | 1.080 and -0.961 e.Å <sup>-3</sup>                                                                                     |                 |

Table 2. Atomic coordinates ( $\times 10^4$ ) and equivalent isotropic displacement parameters ( $\text{\AA}^2 \times 10^3$ ) for YOY6.  $U(\text{eq})$  is defined as one third of the trace of the orthogonalized  $U^{ij}$  tensor.

|       | x        | y        | z        | $U(\text{eq})$ |
|-------|----------|----------|----------|----------------|
| Pd(1) | 4058(1)  | 2545(1)  | 2262(1)  | 32(1)          |
| P(1)  | 2214(1)  | 3634(1)  | 1591(1)  | 31(1)          |
| O(1)  | 4557(1)  | 3896(1)  | 2554(1)  | 47(1)          |
| O(2)  | 2383(2)  | 4511(2)  | 3583(1)  | 67(1)          |
| O(3)  | 5983(1)  | 1448(1)  | 2684(1)  | 45(1)          |
| O(4)  | 6770(2)  | 1053(2)  | 1068(1)  | 61(1)          |
| N(1)  | 3368(2)  | 1194(1)  | 2137(1)  | 34(1)          |
| C(1)  | 3044(2)  | 996(2)   | 1306(1)  | 37(1)          |
| C(2)  | 2518(2)  | 78(2)    | 1296(2)  | 50(1)          |
| C(3)  | 2310(3)  | -611(2)  | 2143(2)  | 57(1)          |
| C(4)  | 2604(2)  | -407(2)  | 3040(2)  | 51(1)          |
| C(5)  | 2384(4)  | -1084(2) | 3961(2)  | 77(1)          |
| C(6)  | 2693(4)  | -858(3)  | 4808(2)  | 89(1)          |
| C(7)  | 3209(3)  | 53(2)    | 4788(2)  | 69(1)          |
| C(8)  | 3434(3)  | 732(2)   | 3919(2)  | 51(1)          |
| C(9)  | 3142(2)  | 510(2)   | 3021(1)  | 39(1)          |
| C(10) | 3187(2)  | 1766(2)  | 369(1)   | 38(1)          |
| C(11) | 2768(2)  | 2979(2)  | 382(1)   | 37(1)          |
| C(12) | 2862(2)  | 3644(2)  | -533(2)  | 47(1)          |
| C(13) | 3357(2)  | 3122(2)  | -1450(2) | 58(1)          |
| C(14) | 3757(3)  | 1935(2)  | -1462(2) | 60(1)          |
| C(15) | 3659(2)  | 1257(2)  | -558(2)  | 50(1)          |
| C(16) | 465(2)   | 3482(1)  | 2177(1)  | 32(1)          |
| C(17) | -496(2)  | 3468(2)  | 1604(2)  | 44(1)          |
| C(18) | -1829(2) | 3355(2)  | 2079(2)  | 52(1)          |
| C(19) | -2208(2) | 3255(2)  | 3109(2)  | 57(1)          |
| C(20) | -1261(3) | 3259(3)  | 3682(2)  | 64(1)          |
| C(21) | 80(2)    | 3371(2)  | 3223(2)  | 50(1)          |
| C(22) | 1930(2)  | 5163(2)  | 1272(1)  | 35(1)          |
| C(23) | 544(2)   | 5971(2)  | 1362(2)  | 40(1)          |

## Supporting information

|       |          |          |         |        |
|-------|----------|----------|---------|--------|
| C(24) | 362(2)   | 7123(2)  | 1030(2) | 50(1)  |
| C(25) | 1546(3)  | 7470(2)  | 618(2)  | 52(1)  |
| C(26) | 2929(3)  | 6684(2)  | 538(2)  | 56(1)  |
| C(27) | 3136(2)  | 5527(2)  | 869(2)  | 50(1)  |
| C(28) | 3591(2)  | 4572(2)  | 3207(2) | 50(1)  |
| C(29) | 4032(3)  | 5536(2)  | 3453(3) | 93(1)  |
| C(30) | 6949(2)  | 957(2)   | 1935(2) | 40(1)  |
| C(31) | 8394(3)  | 218(3)   | 2192(3) | 77(1)  |
| C(32) | -1263(5) | -3615(4) | 4140(3) | 111(1) |
| Cl(1) | -3158(2) | -2997(2) | 4085(1) | 194(1) |
| Cl(2) | -478(2)  | -2605(1) | 3974(1) | 143(1) |

---



Table 3. Bond lengths [ $\text{\AA}$ ] and angles [ $^\circ$ ] for YOY6.

---

|             |            |
|-------------|------------|
| Pd(1)-O(1)  | 2.0164(15) |
| Pd(1)-N(1)  | 2.0601(16) |
| Pd(1)-O(3)  | 2.0901(13) |
| Pd(1)-P(1)  | 2.1885(4)  |
| P(1)-C(16)  | 1.8052(16) |
| P(1)-C(22)  | 1.8065(18) |
| P(1)-C(11)  | 1.8166(19) |
| O(1)-C(28)  | 1.284(2)   |
| O(2)-C(28)  | 1.220(3)   |
| O(3)-C(30)  | 1.276(2)   |
| O(4)-C(30)  | 1.223(3)   |
| N(1)-C(1)   | 1.331(2)   |
| N(1)-C(9)   | 1.385(2)   |
| C(1)-C(2)   | 1.411(3)   |
| C(1)-C(10)  | 1.485(3)   |
| C(2)-C(3)   | 1.349(3)   |
| C(2)-H(2A)  | 0.94(3)    |
| C(3)-C(4)   | 1.404(4)   |
| C(3)-H(3A)  | 0.9300     |
| C(4)-C(9)   | 1.409(3)   |
| C(4)-C(5)   | 1.419(3)   |
| C(5)-C(6)   | 1.357(5)   |
| C(5)-H(5A)  | 0.9300     |
| C(6)-C(7)   | 1.387(5)   |
| C(6)-H(6A)  | 0.9300     |
| C(7)-C(8)   | 1.367(3)   |
| C(7)-H(7A)  | 0.9300     |
| C(8)-C(9)   | 1.413(3)   |
| C(8)-H(8A)  | 0.9300     |
| C(10)-C(15) | 1.394(3)   |
| C(10)-C(11) | 1.404(3)   |
| C(11)-C(12) | 1.391(3)   |
| C(12)-C(13) | 1.389(3)   |

|              |          |
|--------------|----------|
| C(12)-H(12A) | 0.9300   |
| C(13)-C(14)  | 1.375(4) |
| C(13)-H(13A) | 0.9300   |
| C(14)-C(15)  | 1.388(3) |
| C(14)-H(14A) | 0.9300   |
| C(15)-H(15A) | 0.9300   |
| C(16)-C(21)  | 1.383(3) |
| C(16)-C(17)  | 1.390(3) |
| C(17)-C(18)  | 1.383(3) |
| C(17)-H(17A) | 0.95(2)  |
| C(18)-C(19)  | 1.361(3) |
| C(18)-H(18A) | 0.9300   |
| C(19)-C(20)  | 1.374(4) |
| C(19)-H(19A) | 0.9300   |
| C(20)-C(21)  | 1.384(3) |
| C(20)-H(20A) | 0.9300   |
| C(21)-H(21A) | 0.9300   |
| C(22)-C(23)  | 1.385(2) |
| C(22)-C(27)  | 1.399(3) |
| C(23)-C(24)  | 1.388(3) |
| C(23)-H(23A) | 0.9300   |
| C(24)-C(25)  | 1.369(3) |
| C(24)-H(24A) | 1.03(3)  |
| C(25)-C(26)  | 1.374(3) |
| C(25)-H(25A) | 0.93(2)  |
| C(26)-C(27)  | 1.388(3) |
| C(26)-H(26A) | 0.9300   |
| C(27)-H(27A) | 0.9300   |
| C(28)-C(29)  | 1.512(4) |
| C(29)-H(29A) | 0.9600   |
| C(29)-H(29B) | 0.9600   |
| C(29)-H(29C) | 0.9600   |
| C(30)-C(31)  | 1.511(3) |
| C(31)-H(31A) | 0.9600   |
| C(31)-H(31B) | 0.9600   |

|                  |            |
|------------------|------------|
| C(31)-H(31C)     | 0.9600     |
| C(32)-Cl(2)      | 1.658(5)   |
| C(32)-Cl(1)      | 1.799(5)   |
| C(32)-H(32A)     | 0.9700     |
| C(32)-H(32B)     | 0.9700     |
| O(1)-Pd(1)-N(1)  | 172.84(6)  |
| O(1)-Pd(1)-O(3)  | 87.72(6)   |
| N(1)-Pd(1)-O(3)  | 93.76(6)   |
| O(1)-Pd(1)-P(1)  | 94.60(4)   |
| N(1)-Pd(1)-P(1)  | 84.95(4)   |
| O(3)-Pd(1)-P(1)  | 171.50(4)  |
| C(16)-P(1)-C(22) | 107.64(8)  |
| C(16)-P(1)-C(11) | 106.12(9)  |
| C(22)-P(1)-C(11) | 105.15(9)  |
| C(16)-P(1)-Pd(1) | 116.67(6)  |
| C(22)-P(1)-Pd(1) | 120.49(6)  |
| C(11)-P(1)-Pd(1) | 98.70(5)   |
| C(28)-O(1)-Pd(1) | 115.41(14) |
| C(30)-O(3)-Pd(1) | 112.74(12) |
| C(1)-N(1)-C(9)   | 119.49(17) |
| C(1)-N(1)-Pd(1)  | 124.92(12) |
| C(9)-N(1)-Pd(1)  | 115.43(13) |
| N(1)-C(1)-C(2)   | 121.37(18) |
| N(1)-C(1)-C(10)  | 120.37(17) |
| C(2)-C(1)-C(10)  | 118.23(18) |
| C(3)-C(2)-C(1)   | 120.2(2)   |
| C(3)-C(2)-H(2A)  | 122.4(18)  |
| C(1)-C(2)-H(2A)  | 117.4(18)  |
| C(2)-C(3)-C(4)   | 119.9(2)   |
| C(2)-C(3)-H(3A)  | 120.0      |
| C(4)-C(3)-H(3A)  | 120.0      |
| C(3)-C(4)-C(9)   | 118.4(2)   |
| C(3)-C(4)-C(5)   | 122.8(2)   |
| C(9)-C(4)-C(5)   | 118.9(2)   |

|                    |            |
|--------------------|------------|
| C(6)-C(5)-C(4)     | 120.6(3)   |
| C(6)-C(5)-H(5A)    | 119.7      |
| C(4)-C(5)-H(5A)    | 119.7      |
| C(5)-C(6)-C(7)     | 120.4(3)   |
| C(5)-C(6)-H(6A)    | 119.8      |
| C(7)-C(6)-H(6A)    | 119.8      |
| C(8)-C(7)-C(6)     | 121.2(3)   |
| C(8)-C(7)-H(7A)    | 119.4      |
| C(6)-C(7)-H(7A)    | 119.4      |
| C(7)-C(8)-C(9)     | 120.0(2)   |
| C(7)-C(8)-H(8A)    | 120.0      |
| C(9)-C(8)-H(8A)    | 120.0      |
| N(1)-C(9)-C(4)     | 120.62(19) |
| N(1)-C(9)-C(8)     | 120.33(19) |
| C(4)-C(9)-C(8)     | 119.05(19) |
| C(15)-C(10)-C(11)  | 119.43(18) |
| C(15)-C(10)-C(1)   | 117.74(18) |
| C(11)-C(10)-C(1)   | 122.66(16) |
| C(12)-C(11)-C(10)  | 119.04(18) |
| C(12)-C(11)-P(1)   | 121.65(16) |
| C(10)-C(11)-P(1)   | 119.23(13) |
| C(13)-C(12)-C(11)  | 120.8(2)   |
| C(13)-C(12)-H(12A) | 119.6      |
| C(11)-C(12)-H(12A) | 119.6      |
| C(14)-C(13)-C(12)  | 120.1(2)   |
| C(14)-C(13)-H(13A) | 120.0      |
| C(12)-C(13)-H(13A) | 120.0      |
| C(13)-C(14)-C(15)  | 120.0(2)   |
| C(13)-C(14)-H(14A) | 120.0      |
| C(15)-C(14)-H(14A) | 120.0      |
| C(14)-C(15)-C(10)  | 120.6(2)   |
| C(14)-C(15)-H(15A) | 119.7      |
| C(10)-C(15)-H(15A) | 119.7      |
| C(21)-C(16)-C(17)  | 119.40(17) |
| C(21)-C(16)-P(1)   | 118.99(15) |

|                    |            |
|--------------------|------------|
| C(17)-C(16)-P(1)   | 121.61(14) |
| C(18)-C(17)-C(16)  | 120.06(19) |
| C(18)-C(17)-H(17A) | 120.5(16)  |
| C(16)-C(17)-H(17A) | 119.2(16)  |
| C(19)-C(18)-C(17)  | 120.3(2)   |
| C(19)-C(18)-H(18A) | 119.8      |
| C(17)-C(18)-H(18A) | 119.8      |
| C(18)-C(19)-C(20)  | 120.1(2)   |
| C(18)-C(19)-H(19A) | 120.0      |
| C(20)-C(19)-H(19A) | 120.0      |
| C(19)-C(20)-C(21)  | 120.6(2)   |
| C(19)-C(20)-H(20A) | 119.7      |
| C(21)-C(20)-H(20A) | 119.7      |
| C(16)-C(21)-C(20)  | 119.5(2)   |
| C(16)-C(21)-H(21A) | 120.2      |
| C(20)-C(21)-H(21A) | 120.2      |
| C(23)-C(22)-C(27)  | 119.36(17) |
| C(23)-C(22)-P(1)   | 121.35(14) |
| C(27)-C(22)-P(1)   | 119.17(13) |
| C(22)-C(23)-C(24)  | 119.89(19) |
| C(22)-C(23)-H(23A) | 120.1      |
| C(24)-C(23)-H(23A) | 120.1      |
| C(25)-C(24)-C(23)  | 120.48(19) |
| C(25)-C(24)-H(24A) | 117.4(17)  |
| C(23)-C(24)-H(24A) | 122.1(17)  |
| C(24)-C(25)-C(26)  | 120.4(2)   |
| C(24)-C(25)-H(25A) | 115.9(14)  |
| C(26)-C(25)-H(25A) | 123.8(14)  |
| C(25)-C(26)-C(27)  | 120.1(2)   |
| C(25)-C(26)-H(26A) | 119.9      |
| C(27)-C(26)-H(26A) | 119.9      |
| C(26)-C(27)-C(22)  | 119.77(18) |
| C(26)-C(27)-H(27A) | 120.1      |
| C(22)-C(27)-H(27A) | 120.1      |
| O(2)-C(28)-O(1)    | 125.3(2)   |

|                     |            |
|---------------------|------------|
| O(2)-C(28)-C(29)    | 120.5(2)   |
| O(1)-C(28)-C(29)    | 114.1(2)   |
| C(28)-C(29)-H(29A)  | 109.5      |
| C(28)-C(29)-H(29B)  | 109.5      |
| H(29A)-C(29)-H(29B) | 109.5      |
| C(28)-C(29)-H(29C)  | 109.5      |
| H(29A)-C(29)-H(29C) | 109.5      |
| H(29B)-C(29)-H(29C) | 109.5      |
| O(4)-C(30)-O(3)     | 124.87(18) |
| O(4)-C(30)-C(31)    | 120.6(2)   |
| O(3)-C(30)-C(31)    | 114.6(2)   |
| C(30)-C(31)-H(31A)  | 109.5      |
| C(30)-C(31)-H(31B)  | 109.5      |
| H(31A)-C(31)-H(31B) | 109.5      |
| C(30)-C(31)-H(31C)  | 109.5      |
| H(31A)-C(31)-H(31C) | 109.5      |
| H(31B)-C(31)-H(31C) | 109.5      |
| Cl(2)-C(32)-Cl(1)   | 111.9(3)   |
| Cl(2)-C(32)-H(32A)  | 109.2      |
| Cl(1)-C(32)-H(32A)  | 109.2      |
| Cl(2)-C(32)-H(32B)  | 109.2      |
| Cl(1)-C(32)-H(32B)  | 109.2      |
| H(32A)-C(32)-H(32B) | 107.9      |

---

Symmetry transformations used to generate equivalent atoms:

Table 4. Anisotropic displacement parameters ( $\text{\AA}^2 \times 10^3$ ) for YOY6. The anisotropic displacement factor exponent takes the form:  $-2\pi^2 [h^2 a^{*2} U^{11} + \dots + 2 h k a^* b^* U^{12}]$

|       | $U^{11}$ | $U^{22}$ | $U^{33}$ | $U^{23}$ | $U^{13}$ | $U^{12}$ |
|-------|----------|----------|----------|----------|----------|----------|
| Pd(1) | 25(1)    | 32(1)    | 39(1)    | -2(1)    | -10(1)   | -8(1)    |
| P(1)  | 24(1)    | 32(1)    | 35(1)    | 1(1)     | -6(1)    | -8(1)    |
| O(1)  | 33(1)    | 43(1)    | 69(1)    | -9(1)    | -11(1)   | -16(1)   |
| O(2)  | 59(1)    | 76(1)    | 68(1)    | -22(1)   | 6(1)     | -32(1)   |
| O(3)  | 33(1)    | 49(1)    | 49(1)    | -6(1)    | -16(1)   | -4(1)    |
| O(4)  | 61(1)    | 70(1)    | 50(1)    | -9(1)    | -7(1)    | -20(1)   |
| N(1)  | 31(1)    | 32(1)    | 39(1)    | -3(1)    | -10(1)   | -8(1)    |
| C(1)  | 31(1)    | 35(1)    | 43(1)    | -7(1)    | -10(1)   | -5(1)    |
| C(2)  | 51(1)    | 46(1)    | 59(1)    | -12(1)   | -19(1)   | -17(1)   |
| C(3)  | 66(1)    | 44(1)    | 73(1)    | -7(1)    | -17(1)   | -28(1)   |
| C(4)  | 59(1)    | 37(1)    | 58(1)    | -1(1)    | -9(1)    | -20(1)   |
| C(5)  | 116(2)   | 56(1)    | 71(2)    | 12(1)    | -14(2)   | -51(1)   |
| C(6)  | 145(2)   | 70(1)    | 58(2)    | 21(1)    | -18(2)   | -56(2)   |
| C(7)  | 99(2)    | 69(1)    | 44(1)    | 10(1)    | -19(1)   | -38(1)   |
| C(8)  | 65(1)    | 50(1)    | 41(1)    | 3(1)     | -14(1)   | -25(1)   |
| C(9)  | 39(1)    | 35(1)    | 42(1)    | 0(1)     | -8(1)    | -10(1)   |
| C(10) | 29(1)    | 45(1)    | 37(1)    | -6(1)    | -9(1)    | -6(1)    |
| C(11) | 27(1)    | 45(1)    | 36(1)    | -1(1)    | -7(1)    | -9(1)    |
| C(12) | 40(1)    | 55(1)    | 41(1)    | 6(1)     | -7(1)    | -13(1)   |
| C(13) | 48(1)    | 85(2)    | 34(1)    | 6(1)     | -6(1)    | -18(1)   |
| C(14) | 47(1)    | 85(2)    | 39(1)    | -17(1)   | -7(1)    | -6(1)    |
| C(15) | 41(1)    | 58(1)    | 45(1)    | -15(1)   | -12(1)   | -2(1)    |
| C(16) | 25(1)    | 33(1)    | 38(1)    | 2(1)     | -6(1)    | -10(1)   |
| C(17) | 38(1)    | 54(1)    | 45(1)    | 4(1)     | -15(1)   | -18(1)   |
| C(18) | 40(1)    | 61(1)    | 66(1)    | 7(1)     | -22(1)   | -25(1)   |
| C(19) | 35(1)    | 66(1)    | 72(1)    | 13(1)    | -9(1)    | -27(1)   |
| C(20) | 52(1)    | 100(2)   | 45(1)    | 8(1)     | -2(1)    | -39(1)   |
| C(21) | 40(1)    | 76(1)    | 39(1)    | 1(1)     | -8(1)    | -28(1)   |
| C(22) | 33(1)    | 34(1)    | 37(1)    | 4(1)     | -7(1)    | -11(1)   |
| C(23) | 35(1)    | 38(1)    | 45(1)    | -3(1)    | -9(1)    | -9(1)    |

## Supporting information

|       |        |        |        |        |         |         |
|-------|--------|--------|--------|--------|---------|---------|
| C(24) | 51(1)  | 37(1)  | 60(1)  | -2(1)  | -16(1)  | -8(1)   |
| C(25) | 70(1)  | 36(1)  | 53(1)  | 4(1)   | -17(1)  | -21(1)  |
| C(26) | 58(1)  | 52(1)  | 60(1)  | 9(1)   | -7(1)   | -32(1)  |
| C(27) | 38(1)  | 45(1)  | 61(1)  | 7(1)   | -3(1)   | -16(1)  |
| C(28) | 50(1)  | 43(1)  | 61(1)  | -6(1)  | -16(1)  | -17(1)  |
| C(29) | 83(2)  | 71(1)  | 139(3) | -48(2) | -6(2)   | -39(1)  |
| C(30) | 37(1)  | 30(1)  | 54(1)  | -2(1)  | -12(1)  | -10(1)  |
| C(31) | 45(1)  | 69(2)  | 97(2)  | -14(2) | -21(1)  | 11(1)   |
| C(32) | 119(3) | 111(3) | 83(2)  | -22(2) | -15(2)  | -13(2)  |
| Cl(1) | 217(2) | 275(2) | 144(1) | 20(1)  | -109(1) | -110(1) |
| Cl(2) | 159(1) | 109(1) | 137(1) | -2(1)  | -26(1)  | -20(1)  |

---



Table 5. Hydrogen coordinates ( $\times 10^4$ ) and isotropic displacement parameters ( $\text{\AA}^2 \times 10^{-3}$ ) for YOY6.

|        | x        | y        | z        | U(eq)   |
|--------|----------|----------|----------|---------|
| H(2A)  | 2310(30) | -20(20)  | 690(20)  | 68(8)   |
| H(3A)  | 1972     | -1220    | 2132     | 69      |
| H(5A)  | 2025     | -1689    | 3985     | 93      |
| H(6A)  | 2558     | -1315    | 5405     | 107     |
| H(7A)  | 3404     | 204      | 5376     | 83      |
| H(8A)  | 3780     | 1339     | 3920     | 61      |
| H(12A) | 2589     | 4447     | -531     | 57      |
| H(13A) | 3419     | 3576     | -2056    | 70      |
| H(14A) | 4092     | 1586     | -2076    | 72      |
| H(15A) | 3910     | 456      | -570     | 60      |
| H(17A) | -190(30) | 3460(20) | 889(19)  | 52(7)   |
| H(18A) | -2471    | 3348     | 1694     | 63      |
| H(19A) | -3108    | 3185     | 3425     | 68      |
| H(20A) | -1523    | 3186     | 4385     | 77      |
| H(21A) | 717      | 3371     | 3615     | 60      |
| H(23A) | -265     | 5741     | 1644     | 48      |
| H(24A) | -650(30) | 7750(20) | 1070(20) | 70(8)   |
| H(25A) | 1340(20) | 8248(19) | 394(17)  | 41(6)   |
| H(26A) | 3729     | 6926     | 262      | 67      |
| H(27A) | 4073     | 4996     | 823      | 59      |
| H(29A) | 4623     | 5245     | 3952     | 190(20) |
| H(29B) | 3177     | 6163     | 3714     | 230     |
| H(29C) | 4577     | 5813     | 2850     | 230     |
| H(31A) | 9034     | -165     | 1604     | 142(17) |
| H(31B) | 8248     | -353     | 2728     | 170     |
| H(31C) | 8820     | 704      | 2407     | 170     |
| H(32A) | -1172    | -4035    | 4793     | 133     |
| H(32B) | -764     | -4166    | 3620     | 133     |

Table 6. Torsion angles [°] for YOY6.

|                       |             |
|-----------------------|-------------|
| O(1)-Pd(1)-P(1)-C(16) | -121.62(8)  |
| N(1)-Pd(1)-P(1)-C(16) | 51.21(8)    |
| O(3)-Pd(1)-P(1)-C(16) | 132.8(3)    |
| O(1)-Pd(1)-P(1)-C(22) | 11.96(8)    |
| N(1)-Pd(1)-P(1)-C(22) | -175.21(8)  |
| O(3)-Pd(1)-P(1)-C(22) | -93.6(3)    |
| O(1)-Pd(1)-P(1)-C(11) | 125.35(8)   |
| N(1)-Pd(1)-P(1)-C(11) | -61.82(8)   |
| O(3)-Pd(1)-P(1)-C(11) | 19.8(3)     |
| N(1)-Pd(1)-O(1)-C(28) | -21.0(5)    |
| O(3)-Pd(1)-O(1)-C(28) | -123.09(16) |
| P(1)-Pd(1)-O(1)-C(28) | 65.11(15)   |
| O(1)-Pd(1)-O(3)-C(30) | -110.24(14) |
| N(1)-Pd(1)-O(3)-C(30) | 76.78(14)   |
| P(1)-Pd(1)-O(3)-C(30) | -4.2(4)     |
| O(1)-Pd(1)-N(1)-C(1)  | 135.3(4)    |
| O(3)-Pd(1)-N(1)-C(1)  | -123.03(13) |
| P(1)-Pd(1)-N(1)-C(1)  | 48.54(12)   |
| O(1)-Pd(1)-N(1)-C(9)  | -40.1(5)    |
| O(3)-Pd(1)-N(1)-C(9)  | 61.63(12)   |
| P(1)-Pd(1)-N(1)-C(9)  | -126.80(11) |
| C(9)-N(1)-C(1)-C(2)   | -2.1(2)     |
| Pd(1)-N(1)-C(1)-C(2)  | -177.26(13) |
| C(9)-N(1)-C(1)-C(10)  | 176.07(14)  |
| Pd(1)-N(1)-C(1)-C(10) | 0.9(2)      |
| N(1)-C(1)-C(2)-C(3)   | 1.1(3)      |
| C(10)-C(1)-C(2)-C(3)  | -177.09(18) |
| C(1)-C(2)-C(3)-C(4)   | 0.6(3)      |
| C(2)-C(3)-C(4)-C(9)   | -1.2(3)     |
| C(2)-C(3)-C(4)-C(5)   | 178.8(2)    |
| C(3)-C(4)-C(5)-C(6)   | 179.6(3)    |
| C(9)-C(4)-C(5)-C(6)   | -0.4(4)     |
| C(4)-C(5)-C(6)-C(7)   | 1.0(5)      |

|                         |             |
|-------------------------|-------------|
| C(5)-C(6)-C(7)-C(8)     | -0.8(5)     |
| C(6)-C(7)-C(8)-C(9)     | 0.0(4)      |
| C(1)-N(1)-C(9)-C(4)     | 1.4(2)      |
| Pd(1)-N(1)-C(9)-C(4)    | 177.02(14)  |
| C(1)-N(1)-C(9)-C(8)     | -177.90(17) |
| Pd(1)-N(1)-C(9)-C(8)    | -2.3(2)     |
| C(3)-C(4)-C(9)-N(1)     | 0.3(3)      |
| C(5)-C(4)-C(9)-N(1)     | -179.8(2)   |
| C(3)-C(4)-C(9)-C(8)     | 179.58(19)  |
| C(5)-C(4)-C(9)-C(8)     | -0.5(3)     |
| C(7)-C(8)-C(9)-N(1)     | 180.0(2)    |
| C(7)-C(8)-C(9)-C(4)     | 0.7(3)      |
| N(1)-C(1)-C(10)-C(15)   | 143.99(18)  |
| C(2)-C(1)-C(10)-C(15)   | -37.8(2)    |
| N(1)-C(1)-C(10)-C(11)   | -40.8(2)    |
| C(2)-C(1)-C(10)-C(11)   | 137.42(19)  |
| C(15)-C(10)-C(11)-C(12) | -1.2(3)     |
| C(1)-C(10)-C(11)-C(12)  | -176.38(18) |
| C(15)-C(10)-C(11)-P(1)  | -177.94(15) |
| C(1)-C(10)-C(11)-P(1)   | 6.9(2)      |
| C(16)-P(1)-C(11)-C(12)  | 112.26(16)  |
| C(22)-P(1)-C(11)-C(12)  | -1.64(18)   |
| Pd(1)-P(1)-C(11)-C(12)  | -126.61(15) |
| C(16)-P(1)-C(11)-C(10)  | -71.13(16)  |
| C(22)-P(1)-C(11)-C(10)  | 174.97(14)  |
| Pd(1)-P(1)-C(11)-C(10)  | 49.99(15)   |
| C(10)-C(11)-C(12)-C(13) | 0.1(3)      |
| P(1)-C(11)-C(12)-C(13)  | 176.76(17)  |
| C(11)-C(12)-C(13)-C(14) | 0.3(4)      |
| C(12)-C(13)-C(14)-C(15) | 0.3(4)      |
| C(13)-C(14)-C(15)-C(10) | -1.4(4)     |
| C(11)-C(10)-C(15)-C(14) | 1.9(3)      |
| C(1)-C(10)-C(15)-C(14)  | 177.2(2)    |
| C(22)-P(1)-C(16)-C(21)  | -98.30(17)  |
| C(11)-P(1)-C(16)-C(21)  | 149.53(16)  |

|                         |             |
|-------------------------|-------------|
| Pd(1)-P(1)-C(16)-C(21)  | 40.78(17)   |
| C(22)-P(1)-C(16)-C(17)  | 82.06(17)   |
| C(11)-P(1)-C(16)-C(17)  | -30.11(17)  |
| Pd(1)-P(1)-C(16)-C(17)  | -138.86(14) |
| C(21)-C(16)-C(17)-C(18) | 0.7(3)      |
| P(1)-C(16)-C(17)-C(18)  | -179.71(16) |
| C(16)-C(17)-C(18)-C(19) | -0.1(3)     |
| C(17)-C(18)-C(19)-C(20) | -0.4(4)     |
| C(18)-C(19)-C(20)-C(21) | 0.4(4)      |
| C(17)-C(16)-C(21)-C(20) | -0.6(3)     |
| P(1)-C(16)-C(21)-C(20)  | 179.70(19)  |
| C(19)-C(20)-C(21)-C(16) | 0.1(4)      |
| C(16)-P(1)-C(22)-C(23)  | -8.39(19)   |
| C(11)-P(1)-C(22)-C(23)  | 104.44(17)  |
| Pd(1)-P(1)-C(22)-C(23)  | -145.60(14) |
| C(16)-P(1)-C(22)-C(27)  | 175.58(17)  |
| C(11)-P(1)-C(22)-C(27)  | -71.59(19)  |
| Pd(1)-P(1)-C(22)-C(27)  | 38.37(19)   |
| C(27)-C(22)-C(23)-C(24) | 1.5(3)      |
| P(1)-C(22)-C(23)-C(24)  | -174.49(17) |
| C(22)-C(23)-C(24)-C(25) | -0.3(3)     |
| C(23)-C(24)-C(25)-C(26) | -0.7(4)     |
| C(24)-C(25)-C(26)-C(27) | 0.5(4)      |
| C(25)-C(26)-C(27)-C(22) | 0.8(4)      |
| C(23)-C(22)-C(27)-C(26) | -1.8(3)     |
| P(1)-C(22)-C(27)-C(26)  | 174.34(19)  |
| Pd(1)-O(1)-C(28)-O(2)   | -6.5(3)     |
| Pd(1)-O(1)-C(28)-C(29)  | 176.7(2)    |
| Pd(1)-O(3)-C(30)-O(4)   | -3.6(3)     |
| Pd(1)-O(3)-C(30)-C(31)  | 176.06(17)  |

---

Symmetry transformations used to generate equivalent atoms:

## 9. Reference

1. Armarego, W.L.F.; Perrin, D.D. *Purification of Laboratory Chemicals*, 4th ed.; Butterworth-Heinemann: Oxford, UK, 1996.
  2. Cho, C.S.; Ren, W.X.; Yoon, N.S. A Recycle Copper Catalysis in Modified Friedlander Quinoline Synthesis. *J. Mol. Catal. A Chem.* **2009**, 299, 117–120.
  3. Baba, K.; Tobisu, M.; Chatani, N. Palladium-Catalyzed Direct Synthesis of Phosphole Derivatives from Triarylphosphines through Cleavage of Carbon–Hydrogen and Carbon–Phosphorus Bonds. *Angew. Chem. Int. Ed.* **2013**, 52, 11892–11895.
  4. Ternel, J.; Lebarbe, T.; Monflier, E.; Hapiot, F. Catalytic Decarbonylation of Biosourced Substrates. *ChemSuschem* **2015**, 8, 1585–1592.
  5. Chatterjee, A.; Jensen, V.R. A Heterogeneous Catalyst for the Transformation of Fatty Acids to  $\alpha$ -Olefins. *ACS Catal.* **2017**, 7, 2543–2547.
  6. Liu, Y.; Kim, K.E.; Herbert, M.B.; Fedorov, A.; Grubbs, R.H.; Stoltz, B.M. Palladium-Catalyzed Decarbonylative Dehydration of Fatty Acids for the Production of Linear  $\alpha$ -Olefins. *Adv. Synth. Catal.* **2014**, 356, 130–136.
  7. Mayer, M.; Czaplik, W.M.; von Wangelin, A.J. Practical Iron-Catalyzed Allylations of Aryl Grignard Reagents. *Adv. Synth. Catal.* **2010**, 352, 2147–2152.
  8. Abramovitch, A.; Marek, I. *Eur. J. Org. Chem.* **2008**, 4924.
  9. Liu, R.; Lu, Z.-H.; Hiu, X.-H.; Li, J.-L.; Yang, X.-J. Monocarboxylation and Intramolecular Coupling of Butenylated Arenes via Palladium-Catalyzed C–H Activation Process. *Org. Lett.* **2015**, 17, 1489–1492.
  10. Chen, W.; Zuckerman, N.B.; Lewis, J.W.; Konopelski, J.P.; Chen, S. Pyrene-Functionalized Ruthenium Nanoparticles: Novel Fluorescence Characteristics from Intraparticle Extended Conjugation. *J. Phys. Chem. C* **2009**, 113, 16988–16995.
-
